1

2

3 **The coagulation factor IX (F9) loss of function prevents**  
4 **the cell cycle arrest induced by CDK4/6 inhibitors**  
5 **treatment**

6 Paula Carpintero-Fernández<sup>1,2</sup>, Michela Borghesan<sup>1,3</sup>, Olga Eleftheriadou<sup>1</sup>, Juan  
7 Antonio Fafián-Labora<sup>1</sup>, Tom P. Mitchell<sup>4</sup>, Tom D. Nightingale<sup>4</sup>, María D. Mayán<sup>2</sup>  
8 and Ana O’Loughlen<sup>1,\*</sup>

9

10 <sup>1</sup>Epigenetics & Cellular Senescence Group; Blizard Institute; Barts and The London School of  
11 Medicine and Dentistry; Queen Mary University of London; 4 Newark Street; London E1 2AT, United  
12 Kingdom

13 <sup>2</sup>Present address: CellCOM Research Group. Instituto de Investigación Biomédica de A Coruña  
14 (INIBIC). CH-Universitario A Coruña (XXIAC). Universidade da Coruña. Servizo Galego de Saúde  
15 (SERGAS). Xubias de Arriba, 84 15006 A Coruña, Spain

16 <sup>3</sup>Present address: European Research Institute for the Biology of Ageing (ERIBA), University  
17 Medical Center Groningen (UMCG), University of Groningen (RUG, Groningen NL, The  
18 Netherlands.

19 <sup>4</sup>Centre for Microvascular Research. The William Harvey Research Institute. Charterhouse Square  
20 Barts and the London School of Medicine and Dentistry Queen Mary University of London, EC1M  
21 6BQ, London (UK)

22

23 \*Corresponding Author: a.ologhlen@qmul.ac.uk

24

25 **Keywords:** Palbociclib, senescence, coagulation factor IX (F9), breast cancer,  
26 coagulation, CDK4/6 inhibitors, CRISPR/Cas9, screen

27

28

29 **SUMMARY**

30

31 During this last decade the development of pro-senescence therapies has become an  
32 attractive strategy as cellular senescence acts as a barrier against tumour progression. In  
33 this context, CDK4/6 inhibitors induce senescence and have showed efficacy in reducing  
34 tumour growth in breast cancer patients. However, even though cancer cells are arrested  
35 after CDK4/6 inhibitor treatment, genes regulating senescence in this context are still  
36 unknown limiting their anti-tumour activity. Here, using a functional genome wide  
37 CRISPR/Cas9 genetic screen we found several genes that synergistically participate in the  
38 proliferation arrest induced by the CDK4/6 inhibitor, Palbociclib. We find that  
39 downregulation of the coagulation factor IX (*F9*) using sgRNA and shRNA prevents the  
40 cell cycle arrest and senescent-like phenotype induced in MCF7 breast tumour cells upon  
41 Palbociclib treatment. These results were confirmed using another breast cancer cell line  
42 and with an alternative CDK4/6 inhibitor, Abemaciclib, and further tested in a panel of 22  
43 cancer cells. While *F9* knockout reduces senescence, treatment with a recombinant *F9*  
44 protein was sufficient to induce a cell cycle arrest and senescence-like state in MCF7  
45 tumour cells. Besides, endogenous *F9* is upregulated in different human primary cells  
46 cultures undergoing senescence. Importantly, bioinformatics analysis of cancer datasets  
47 suggest a role for *F9* in human tumours. Altogether, these data collectively propose key  
48 genes involved in CDK4/6 inhibitors response that will be useful to design new therapeutic  
49 strategies in personalized medicine in order to increase their efficiency, stratify patients  
50 and avoid drug resistance.

51

52 **INTRODUCTION**

53 A key characteristic of cancer cells is the deregulation of cell cycle checkpoint proteins  
54 such as the cyclin-dependent kinases (CDKs) CDK4 and CDK6 leading to uncontrolled  
55 cell proliferation. Molecular changes at CDKs level have been reported in various cancer  
56 types making them an attractive potential target for new treatments<sup>1, 2</sup>. CDK inhibitors, in  
57 particular CDK4/6 inhibitors (Abemaciclib, Palbociclib and Ribociclib) induce a cell-cycle  
58 arrest and subsequently activate senescence in many human cancer cell lines<sup>3, 4, 5, 6, 7, 8</sup>.  
59 Also, these inhibitors have been recently reported to promote anti-tumour immunity<sup>9</sup>,  
60 reduce NADPH and glutathione levels<sup>10</sup> and stimulate tumour antigen presentation<sup>11</sup>.  
61 Although the three CDK4/6 inhibitors reached phase III clinical trials, Palbociclib  
62 progressed towards the clinic, receiving accelerated approval from the Food and Drug  
63 Administration (FDA) in February 2015<sup>12</sup> for estrogen-receptor positive (ER<sup>+</sup>)/HER2  
64 negative (HER2<sup>-</sup>) breast cancer subtypes. Abemaciclib was FDA approved in 2017 to be  
65 used either alone<sup>13</sup> or in combination with fulvestrant for women with ER<sup>+</sup>/HER2<sup>-</sup> advanced  
66 or metastatic breast cancer with disease progression following endocrine therapy<sup>14, 15</sup>.

67

68 Palbociclib (PD-0332991), a second-generation CDK4/6 inhibitor, has shown  
69 effectiveness specially in advanced ER<sup>+</sup>/HER2<sup>-</sup> breast cancer<sup>16</sup>, improving the patient  
70 progression-free survival from 18 to 27 months<sup>17</sup>. Palbociclib showed beneficial effects  
71 compared to hormone therapy, letrozole (an aromatase inhibitor) or fulvestrant (an ER<sup>+</sup>  
72 antagonist) when using alone<sup>16, 18</sup>. Importantly, there are several clinical trials undergoing  
73 employing Palbociclib in a variety of other cancer types such as squamous cell lung cancer  
74 (NCT02785939), pancreatic neuroendocrine tumours (NCT02806648) and  
75 oligodendroglioma and oligoastrocytoma (NCT02530320). However, not all patients  
76 respond to Palbociclib treatment suggesting that mechanisms that drive resistance or  
77 prevent the expected response exist, highlighting the importance to develop more  
78 personalized cancer therapies<sup>15</sup>. Mechanistically, Palbociclib inhibits the phosphorylation

79 of retinoblastoma (RB1), stabilizing the RB1-E2F inhibitory complex and preventing the  
80 activity of E2F transcription factor family that regulates cell cycle progression and  
81 apoptosis<sup>19</sup>. In fact, Palbociclib induces cellular senescence by inducing a G1 arrest and  
82 inhibits growth of tumour xenographs *in vivo*<sup>20, 21</sup>. Furthermore, loss of RB1 function is an  
83 established mechanism of primary resistance to CDK4/6 inhibitors *in vitro*<sup>15, 19, 22</sup>. However,  
84 further research is required to identify new biomarkers of resistance to these inhibitors.

85

86 Cellular senescence is defined as a state in which cells lose their proliferative  
87 capacity despite them being metabolically active. Senescent cells participate in a wide  
88 range of biological processes playing both beneficial or detrimental effects for the  
89 organism<sup>23, 24</sup>. As part of the senescence program, senescent cells differ from dividing cells  
90 in terms of gene expression, chromatin structure and metabolism<sup>24, 25</sup> which makes them  
91 susceptible to certain drugs that do not affect their proliferating counterparts<sup>26</sup>. Senescent  
92 cells also comprise a complex of pro-inflammatory response proteins known as  
93 senescence-associated secretory phenotype (SASP)<sup>27</sup>. The SASP is characterised by the  
94 secretion of cytokines, enzymes, and chemokines that cause inflammation and is pivotal  
95 for the clearance of senescent cells by phagocytosis<sup>28</sup>. However, the role the SASP plays  
96 during cancer is still under debate<sup>24, 25</sup>. While some studies show its beneficial effects as a  
97 tumour suppressor mechanism, others have demonstrated the SASP promotes  
98 tumorigenesis<sup>29, 30</sup>. Although most primary cell types follow the senescence program and  
99 have beneficial effects for the microenvironment<sup>23</sup>, cancer cells tend to overcome  
100 senescence resulting in uncontrolled cellular proliferation and tumorigenesis<sup>24, 25</sup>. Thus, the  
101 molecular mechanisms by which CDK4/6 inhibitors induce senescence in cancer cells and  
102 the genes involved in conferring drug resistance are unknown. This lack of knowledge  
103 prevents the stratification of patients prior to Palbociclib treatment or to develop therapeutic  
104 strategies to avoid drug resistance in order to increase the progression free survival of  
105 cancer patients.

106

107           In this study, using a human genome-wide CRISPR/Cas9 library we identified  
108 genes whose loss of function prevent the proliferative arrest induced by Palbociclib in  
109 MCF7 breast cancer cell line. Validation of the CRISPR/Cas9 screen using four  
110 independent sgRNA and two individual shRNA confirmed that among the identified genes,  
111 the coagulation factor IX (*F9*) participates in the cell cycle arrest induced by Palbociclib.  
112 These results were established using Abemaciclib where we saw that downregulation of  
113 *F9* also prevented the induction of senescence. Meanwhile, treatment of the breast cancer  
114 cell line MCF7 with recombinant *F9* induced a senescence-like proliferative arrest. Our  
115 results demonstrate that *F9* mRNA is endogenously upregulated upon the acquisition of  
116 the senescent phenotype as shown during oncogene-induced senescence (OIS), DNA  
117 damage-induced senescence (DDIS) and therapy-induced senescence (TIS) in human  
118 primary fibroblasts. Furthermore, treatment of human primary endothelial cells with  
119 Palbociclib mimicked a senescence-like phenotype increasing the expression of *F9*. Finally,  
120 we screened a panel of 22 cancer cell lines for their response to different CDK4/6 inhibitors  
121 and we show that *F9* loss of function confers a partial resistance to the proliferative arrest  
122 induced by CDK4/6 inhibitors in other tumour types. Analyses of published datasets also  
123 suggest a role for *F9* in carcinogenesis in different tumours in humans. Importantly, our  
124 results open new therapeutic opportunities with the potential to stratify patients for CDK4/6  
125 inhibitors response prior to treatment.

126

127 **RESULTS**

128 **A CRISPR/Cas9 genome-wide screen identifies genes regulating the proliferative**  
129 **arrest induced by Palbociclib treatment**

130 In order to identify genes whose loss of function (LOF) overcome the proliferative  
131 arrest induced by Palbociclib (PD-0332991 or Palbo hereafter) we performed a  
132 CRISPR/Cas9 screen using the human genome-wide library GeCKOv2<sup>31, 32</sup>. This library  
133 contains ~ 123,441 unique sgRNA targeting 19,050 genes in the human genome with a  
134 coverage of 5-6 sgRNA per gene (**Figure 1A**). Firstly, to confirm that treatment with Palbo  
135 induces senescence we treated the ER<sup>+</sup> breast cancer cell line MCF7 with increasing  
136 concentrations of Palbo (0.1, 0.2, 0.5 and 1 $\mu$ M) for 7 and 14 days and analysed a variety  
137 of markers characteristic of senescence. We confirmed that treatment with Palbo induced  
138 a stable cell cycle arrest by quantifying the number of cells staining positive for BrdU in  
139 addition to determining the relative cell number (**Figure S1A**). Furthermore, Palbo  
140 treatment induced an increased in lysosomal activity, a common characteristic of  
141 senescence by measuring  $\beta$ -Galactosidase activity (SA- $\beta$ -Gal) (**Figure S1B**). Neither of  
142 the doses used induced apoptosis quantified by measuring the number of cells staining  
143 positive for AnnexinV (**Figure S1C**). We next determined additional markers of  
144 senescence by treating MCF7 with 200nM Palbo during 14 days and confirmed SA- $\beta$ -Gal,  
145 in addition to an increase in the number of cells staining positive for p21<sup>CIP</sup> by  
146 immunofluorescence (**Figure S1D-F**). Next, we infected MCF7 cells with a single-vector  
147 lentiviral construct (comprising sgRNA and human Cas9 in a single vector), lentiCRISPRv2,  
148 empty vector (**Figure S1G**) or containing the GeCKO pooled library and treated them with  
149 DMSO or 200nM Palbo for 14 days (**Figure 1A**). As proof of concept that the screen  
150 worked, MCF7 cells were plated at low density to determine their proliferative capacity  
151 where an advantage in proliferation can be observed upon the expression of the GeCKO  
152 library (**Figure 1B**). Enrichment of sgRNAs after two weeks Palbo treatment compared to  
153 day 0 was determined by genomic DNA extraction and deep sequencing as previously

154 described<sup>31, 32</sup> (**Figure 1C**). Among all the sgRNA enriched after two weeks treatment  
155 ( $p < 0.05$ ) we selected: (i) single sgRNA enriched more than  $\geq 2 \log_2$  fold change RPKM  
156 between day 0 and 14 and, (ii) those sgRNA where we found more than  $\geq 3$  individual  
157 sgRNA per gene preventing the proliferative arrest. This gave us a list of 18 potential genes  
158 whose loss of function prevent the cell cycle arrest induced by Palbo (**Figure 1D**). We  
159 subjected these 18 genes to KEGG (Kyoto Encyclopedia of Genes and Genomes) pathway  
160 and STRING protein interaction analysis and strikingly we noted a number of genes  
161 associated with the blood coagulation pathway (**Figure 1E,1F**). Within these genes we  
162 found overrepresentation of the coagulation factor IX (*F9*) and Protein Z Vitamin K  
163 Dependent Plasma Glycoprotein (*PROZ*) (**Figure 1D, 1E**). Enrichment of the individual  
164 sgRNA within the GeCKO library belonging to the coagulation pathway (5 sgRNAs for  
165 *PROZ* and 6 sgRNA for *F9*) with  $\geq 2 \log_2$  fold change RPKM after two weeks Palbo  
166 treatment show a statistical difference (**Figure 1G**). Altogether, these data propose 18  
167 candidate genes whose loss-of-function prevent the proliferation arrest induced by Palbo  
168 with an overrepresentation of two genes involved in the blood coagulation pathway.

169

#### 170 ***F9* and *PROZ* loss of function prevents the proliferation arrest induced by Palbo**

171 It has been recently reported that chemotherapy-induced senescence potentiates blood  
172 clotting by modifying platelet function<sup>33</sup>. Among the genes identified in our screen we found  
173 overrepresentation of two factors participating in the blood coagulation pathway (**Figure**  
174 **1D-G**), thus we decided to focus on these genes for further validation. For this we designed  
175 and cloned 4 additional sgRNA sequences different from those in the GeCKO library  
176 targeting *PROZ* (sg*PROZ*) and *F9* (sg*F9*). We also included an sgRNA targeting *RB1*  
177 (sg*RB*) as a positive control, as cancer cells lacking this gene generally do not respond to  
178 CDK4/6 inhibitors<sup>16</sup>. MCF7 cells were infected with the 4 sgRNAs targeting each candidate  
179 gene. To determine their proliferative capacity, MCF7 cells were treated with either DMSO  
180 or 200nM Palbo and cell numbers were determined on days 6, 12 and 20 after Palbo

181 treatment (**Figure 2A**). The ability of sgRNAs targeting *F9*, *PROZ* and *RB1* to prevent the  
182 proliferation arrest induced by Palbo, was confirmed by proliferation curves at different  
183 days as shown in **Figure 2B**. In fact, sgF9 and sgPROZ bypassed the cell cycle halt  
184 induced by Palbo when compared with MCF7 control cells at day 20 (**Figure 2B**). The  
185 efficacy of the different sgRNAs was assessed at the mRNA level by qPCR (**Figure S2A**)  
186 and protein level for RB (**Figure S2B**). Furthermore, we established that the basal cell  
187 proliferation rate was not affected by the sgRNA expression in comparison with the control  
188 cells (**Figure 2C**) confirming that the bypass in proliferation was specific to sgF9 and  
189 sgPROZ upon Palbo treatment. We further established we could observe an increase in  
190 the mRNA expression levels of *F9* and *PROZ* in MCF7 cells after treating with Palbo for  
191 20 days (**Figure 2D**). Next, as F9 can be secreted we determined whether we could detect  
192 it in the conditioned media upon in senescent cells treated with Palbo. As expected, we  
193 could confirm an increase in the amount of F9 released upon Palbo treatment by ELISA  
194 (**Figure 2E**), suggesting that F9 could be part of the SASP.

195 We next wanted to confirm that the proliferation arrest upon Palbo treatment was stable, a  
196 characteristic of senescence, and that both sgPROZ and sgF9 were implicated in  
197 bypassing this arrest, thus not due to spontaneous hyperproliferation. For this, we treated  
198 MCF7 cells for 6 days with Palbo, washed the plates and cultured them further in the  
199 absence of this drug until day 20 (**Figure S2C**). As shown in **Figure S2D** treatment of  
200 MCF7 cells with Palbo resulted in a stable inhibition of proliferation even in the absence of  
201 the drug while the expression of both sgF9 and sgPROZ prevented this proliferation arrest  
202 as shown by low density MCF7 plating and crystal violet staining (**Figure S2D**).

203

#### 204 ***F9* loss of function prevents the senescence-like phenotype induced by Palbo**

205 Next, we decided to focus on *F9* knockout as its proliferation bypass is stronger than  
206 sgPROZ (**Figure 2B**). We thus determined whether this proliferative advantage was  
207 maintained using different concentrations of Palbo. For this, we treated MCF7 cells with



208 200nM and 500nM Palbo for 20 days and the relative cell number was determining at day  
209 20 (**Figure S2E**). The knockout efficiency of sgF9 and sgRB were tested after day 20 Palbo  
210 treatment to ensure the plasmid expression was not lost (**Figure S2F**). Additional methods  
211 were used to determine the bypass mediated by sgF9 such as quantifying the percentage  
212 of cells staining positive for Ki67 by IF (**Figure 2F**) and low density cell plating and crystal  
213 violet staining (**Figure S2G**). We next tested whether sgF9 could be inducing an increase  
214 in the migration capacity of MCF7 cells, thus promoting tumorigenesis. However, migration  
215 assays show a decrease in the relative number of MCF7 cells migrating upon 500nM Palbo  
216 treatment for 20 days which is not prevented by the loss of F9 (**Figure S2H**). MDA-MD-  
217 468 cells were used as a positive control due to their high migration capacity.  
218 To further confirm the specificity of sgF9 in bypassing Palbo growth inhibition and to  
219 exclude the potential implication of off-target effects derived from using CRISPR/Cas9  
220 technique, we infected MCF7 cells with two independent viral constructs carrying an  
221 shRNA targeting *F9* (shF9#3 and shF9#4) and treated MCF7 cells with 500nM Palbo for  
222 20 days. Both shF9 constructs recapitulated the effects observed with the sgRNA targeting  
223 *F9* measured by quantifying the number of cells staining positive for BrdU (**Figure 2G**). *F9*  
224 downregulation using both shF9 constructs was confirmed at the mRNA level by qPCR  
225 (**Figure S2I**). Altogether, these data show that *F9* loss of function using both genome  
226 editing and RNAi interference techniques overcomes the cell cycle arrest induced by Palbo  
227 treatment in MCF7 cells.

228

### 229 **F9 is endogenously upregulated during senescence**

230 Next, we set to determine the importance of F9 expression during senescence; thus, we  
231 evaluated whether *sgF9* prevented the induction of other features of senescence induced  
232 by Palbo such as the SASP. We can observe that *sgF9* downregulates several SASP  
233 mRNA transcripts upregulated by the treatment with 500nM Palbo such as *MMP9*, *MMP3*,  
234 *IL1B* and *IL6* while having no effect on *CCL20*, *IL1A* or *IL8* (**Figure 3A**). Importantly, sgRB

235 which is known to prevent the activation of senescence averted the endogenous  
236 upregulation of *F9* mRNA levels (**Figure 3B**), suggesting that *F9* mRNA expression is  
237 dependent on RB1. As oncogene-induced senescence (OIS) is a potent tumour  
238 suppressor mechanism both *in vitro* and *in vivo*, we next took advantage of human primary  
239 fibroblasts (HFFF2) expressing an endoplasmic reticulum (ER):H-RAS<sup>G12V</sup> fusion protein  
240 (iRAS). Upon treatment with 200nM 4-hydroxytamoxifen (4OHT) for 6 days, senescence  
241 is progressively established<sup>8, 34</sup>. By quantifying the mRNA levels of *F9*, we can observe a  
242 consistent upregulation of endogenous *F9* during OIS (**Figure 3C, left panel**). In addition,  
243 we confirmed that the upregulation of *F9* transcript was accompanied by increased levels  
244 in SA-β-gal activity upon iRAS induction compared to the vector control (**Figure S3A**). We  
245 also observed an upregulation of endogenous *F9* mRNA levels in HFFF2 during DNA-  
246 damage-induced senescence (DDIS) induced by treating HFFF2 with 50μM etoposide for  
247 2 days and collecting for RNA at day 7 (**Figure 3C, middle panel**). Moreover, treatment  
248 of HFFF2 fibroblasts with 1μM Palbo for 7 days, mimicking therapy-induced senescence  
249 (TIS), also triggered endogenous upregulation of *F9* mRNA (**Figure 3C, right panel**).  
250 Confirmation of the induction of senescence was further demonstrated by showing a  
251 reduction in cell proliferation measured by quantifying cell number (**Figure S3B**) and an  
252 increase in the number of SA-β-gal positive cells (**Figure S3C**) as previously<sup>8, 34, 35</sup>.  
253 Uncontrolled coagulation contributes to the pathophysiology of several chronic  
254 inflammatory diseases. In these conditions senescent cells are often observed and  
255 participate in the generation of inflammation<sup>36</sup>. Besides, endothelial cell activation during  
256 disease depends on a broad range of inflammatory mediators released by platelets<sup>37</sup>.  
257 While the role of platelets in haemostasis and wound repair is well known<sup>38</sup> the participation  
258 of senescent cells in haemostasis was not reported until recently<sup>33</sup>. On the basis of these  
259 observations, we wanted to evaluate if the induction of senescence in human umbilical  
260 vein endothelial cells (HUVEC) using Palbo increases the expression levels of *F9*.  
261 Consistent with the data obtained for MCF7 and HFFF2, HUVEC cells treated with 500nM

262 Palbo for 7 days showed an increase in the percentage of cells staining positive for F9 as  
263 shown by IF and its relative quantification (**Figure 3D, 3E**) and a reduced proliferation  
264 quantified by determining the percentage of cells incorporating BrdU (**Figure S3D, S3E**).  
265 In parallel, we observed an increase in the protein levels of the cell-cycle inhibitor p21<sup>CIP1</sup>  
266 (**Figure S3D**) and in the quantification of the number of cells incorporating BrdU (**Figure**  
267 **S3E**).  
268 Finally, we tested if ectopic administration of F9 using recombinant F9 (rF9) protein,  
269 induced senescence in MCF7 cells. The results obtained demonstrate that the  
270 administration of 10µg/mL rF9 twice for 6 days induced a senescence-like phenotype in  
271 MCF7 cells shown by a reduction in the number of cells staining positive for BrdU  
272 concomitant with an increase in number of cells staining positive for p21<sup>CIP1</sup> (**Figure 3F**).  
273 We further confirmed the proliferation arrest quantifying the relative cell number upon rF9  
274 treatment (**Figure 3F**). Altogether, these data highlight the implication of F9 during  
275 senescence induced by a variety of triggers in different primary cell cultures.

276

#### 277 **F9 regulates senescence in MCF7 cells treated with Abema and in T47D**

278 Next, we wanted to determine whether the proliferation bypass by *F9* loss of function was  
279 due to the specific inhibition of CDK4/6 and not due to off target effects induced by Palbo.  
280 For this determined the ability of MCF7 cells to respond to increasing concentrations of  
281 other CDK4/6 inhibitors (Abemaciclib or Abema and Ribociclib or Ribo) (**Figure 4A**). We  
282 used increasing concentrations of Abema and Ribo (0.25, 1 and 5µM), and included Palbo  
283 as a positive control (**Figure 4A, 4B**). We could indeed observe a dose-dependent cell  
284 cycle arrest upon treatment with other CDK4/6 inhibitors (Abema in particular) (**Figure 4B**)  
285 which was maintained after 14 days of continuous treatment (**Figure S4A, S4B**). We next  
286 confirmed the induction of a stable cell cycle arrest characteristic of senescence by treating  
287 MCF7 cells for 6 days with Abema, Palbo or Ribo, withdrawing the inhibitors and leaving  
288 for 14 further days after the drug removal (**Figure S4C**). Our data confirm that both Palbo

289 and Abema induce a stable cell cycle arrest or senescence even after drug withdrawal  
290 which was not maintained when the cells were treated with Ribo (**Figure S4C**). In line with  
291 these results, we could observe by qPCR analysis upregulation of *F9* mRNA levels when  
292 MCF7 cells were treated with Palbo and Abema but not with Ribo (**Figure 4C**). To further  
293 confirm an implication for *F9* in overcoming the proliferative arrest induced by CDK4/6  
294 inhibitors, we treated MCF7 cells infected with sgF9 for 20 days with 1 $\mu$ M Abemaciclib.  
295 Consistent with our previous results, sgF9 partially prevented the cell cycle arrest induced  
296 by Abema as shown by an increase in the number of cells stained by crystal violet (**Figure**  
297 **4D**). Next, we determined the implication of sgF9 using another ER<sup>+</sup> (T47D) and the triple  
298 negative (MDA-MB-468) breast cancer cell lines. sgF9 also prevented the cell cycle arrest  
299 induced by Palbo in T47D cells as shown by determining proliferation by colony formation  
300 assays and crystal violet staining (**Figure 4E**) and by counting relative cell numbers  
301 (**Figure 4F**). The knockout efficiency for *RB* and *F9* was determined at the protein level for  
302 *RB* (**Figure S4D**) and RNA levels for *RB* and *F9* (**Figure S4E**). However, MDA-MB-468  
303 cells did not respond to Palbo treatment as previously reported<sup>20</sup> (**Figure 4E**) in spite of *F9*  
304 and *RB* being downregulated (**Figure S4F**) by their respective sgRNAs. The induction of  
305 senescence by Palbo treatment was confirmed in T47D also by determining SA- $\beta$ -Gal  
306 activity and quantification (**Figure 4G**). The secretion of F9 protein to the conditioned  
307 media was also confirmed by ELISA in T47D cells upon 1 $\mu$ M Palbo treatment for 20 days  
308 (**Figure 4H**). The implication of *F9* loss of function in T47D cell lines was also validated  
309 using two independent shF9#3 and shF9#4 by crystal violet staining (**Figure S4G**) and  
310 relative cell counting (**Figure S4H**). Confirmation of the knockdown efficiency was  
311 determined by measuring the levels of *F9* upon shF9 infection in T47D cells (**Figure S4I**).

312

### 313 **Other cancer cell lines respond to CDK4/6 inhibitors and induce *F9* upregulation**

314 To further determine if there is a wider implication for *F9* loss of function in other types of  
315 cancers we tested a panel of 22 cancer cell lines from different origins and molecular

316 characteristic with increasing concentrations of Palbo, Abema and Ribo (**Figure 5A and**  
317 **Figure S5A**). As shown in **Figure 5B**, 8 cancer cell lines (including MCF7) responded to  
318  $\geq 2$  CDK4/6 inhibitors in a dose-dependent and statistically significant manner ( $p < 0.05$ )  
319 (**Figure S5A**). Further validation of these 8 cells lines in a secondary screen re-evaluating  
320 the proliferation arrest induced by all three CDK4/6 inhibitors confirmed the response of 5  
321 cell lines ( $p < 0.05$ ) to more than two CDK4/6 inhibitors (MCF7, SKMEL28, ACHN, HT-29,  
322 SNU387) (**Figure 5C, Figure S5B, S5C**). Next, we determined which of these 5 cell lines  
323 (excluding MCF7 which we already validated) induced an upregulation of endogenous *F9*  
324 mRNA levels upon the treatment with different CDK4/6 inhibitors by qPCR. Of all the  
325 cancer cell lines analysed, the renal adenocarcinoma cell line (ACHN) was the only cell  
326 line to upregulate *F9* with Palbo and Abema (**Figure 5D**), while in the human colorectal  
327 adenocarcinoma cell line (HT29) and the hepatocellular carcinoma cell (SNU-387) induced  
328 endogenous levels of *F9* mRNA expression only with Palbo (**Figure 5D**). In accordance  
329 with our previous results, *F9* was not upregulated by Ribo in any of the cell lines analysed  
330 (**Figure 5D**). Interestingly, we show a partial proliferation bypass by crystal violet staining  
331 in ACHN upon sh*F9#4* expression (**Figure 5E**). This bypass could implicate that *F9* is only  
332 partially important in Palbo induced senescence in ACHN cells and that other mechanisms  
333 might be implicated. Altogether, our data highlight a partial relevance for *F9* mRNA  
334 expression in other cancer cell lines.

335

### 336 ***F9* is highly expressed in the tumour stroma**

337 As we can observe an increase in *F9* mRNA levels in HFFF2 fibroblasts undergoing  
338 senescence, we next sought to explore published cancer datasets analysing tumour  
339 stroma<sup>39</sup>. We found that *F9* is upregulated in the tumour stroma in comparison with healthy  
340 stroma in breast and colon cancer, but not in prostate cancer lesions (**Figure 6A**).  
341 Interestingly, when analysing other transcripts implicated in the intrinsic coagulation  
342 pathway, where *F9* is involved, most are also upregulated in breast cancer, while

343 transcripts within the extrinsic pathway are mainly downregulated (**Figure 6B**)<sup>39</sup>. These  
344 data are in accordance with published studies showing a correlation between thrombosis  
345 and cancer<sup>40, 41</sup>. As the tumour microenvironment is composed of cancer cells and stroma,  
346 we next sought to identify whether a cross talk existed between HFFF2 fibroblasts  
347 undergoing senescence by iRAS expression and MCF7 treated with DMSO or Palbo  
348 (**Figure 6C**). Senescence was induced in HFFF2 iRAS cells by treating them with or  
349 without 200nM 4OHT for 3 days, washed to prevent transfer of 4OHT, incubated with fresh  
350 media after which the conditioned media (CM) was collected (**Figure 6C**). Next, MCF7 pre-  
351 treated with or without 500nM Palbo were incubated with the CM from HFFF2 cells for 72h  
352 and we determined if we could observe changes in *F9* mRNA levels (**Figure 6D**).  
353 Interestingly, we found a sharp increase in *F9* mRNA levels when senescent MCF7 cells  
354 (treated with Palbo) were incubated with the CM of senescent HFFF2 (+4OHT). This  
355 increase also correlated with other SASP mRNA transcripts (**Figure 6E**) suggesting that  
356 senescent fibroblasts are reinforcing the SASP in already senescent MCF7 cells.

357

### 358 ***F9* loss of function is associated with metastasis and worst survival prognostics in** 359 **cancer**

360 Our data suggest that increased levels of *F9* upon the induction of senescence maintain  
361 certain cancer cells in a stable cell cycle arrest, while *F9* loss of function promotes a  
362 proliferative advantage. In fact, in accordance with our data low levels of *F9* are associated  
363 with liver metastasis in comparison with normal liver<sup>42</sup> (**Figure 6F**). Importantly, high levels  
364 of *F9* expression are a sign of good prognostic for survival in breast cancer in comparison  
365 with those patients presenting low levels of *F9* expression when analysing the breast  
366 cancer dataset<sup>43</sup> (**Figure 6G**). Altogether, these data show the potential of using *F9* levels  
367 as a biomarker for patient stratification not only to predict response to CDK4/6 inhibitors  
368 but also as a prognostic marker to determine overall survival in breast cancer.

369

370 **DISCUSSION**

371 A better understanding of the mechanisms regulating senescence induced by treating  
372 cancer cells with CDK4/6 inhibitors is needed in order to increase the efficacy of targeted  
373 therapy in cancer and to be able to stratify patients. While previous *in vitro* studies showed  
374 that RB, cyclin D1 and p16 could predict Palbociclib response<sup>44, 45, 46</sup>, results from Phase  
375 II/III clinical trials show no correlation between the expression of CCND1, p16 or Ki67  
376 leaving no prognostic or predictive biomarkers that allow to secure drug efficacy and  
377 diminish drug resistance or response<sup>16, 47 48</sup>. In this study, we provide evidence that the  
378 coagulation factor IX (*F9*) plays an important role in regulating the cell cycle arrest and  
379 senescence phenotype induced by CDK4/6 inhibitors in ER<sup>+</sup> breast cancer cell lines and  
380 other cancer cells.

381 CDK4/6 inhibitors (Palbociclib, Abemaciclib, Ribociclib) are considered highly  
382 selective new generation small molecule inhibitors that bind to the CDK4 and CDK6 ATP-  
383 binding pocket, leading to the inactivation of CDK4/6-CyclinD complexes with the  
384 subsequent inhibition of RB phosphorylation and induction of a G1 phase arrest<sup>2</sup>. In fact,  
385 CDK4/6 inhibitors induce a senescence-like state in different cell types<sup>8, 49, 50</sup>. However,  
386 their highest effect was demonstrated in preventing hormone-dependent cell-cycle entry in  
387 advanced ER<sup>+</sup> breast cancer cells<sup>7</sup>. Our results confirmed that the treatment of the ER<sup>+</sup>  
388 breast cancer cell line MCF7 with different concentrations of CDK4/6 inhibitors, induces a  
389 stable proliferation arrest and a senescence-like phenotype shown by an increase in  $\beta$ -  
390 galactosidase activity and the expression of senescence markers such as p21<sup>CIP1</sup>. While  
391 the three CDK4/6 inhibitors have demonstrated greater efficacy in combination with  
392 endocrine therapy in postmenopausal women (PALOMA-2, MONALEESA-2, MONARCH-  
393 3 trials) and significantly prolonged the progression-free survival from 18 months to more  
394 than 27<sup>16, 51, 52, 53</sup>, genes regulating senescence induction in cancer cells have not been  
395 identified yet. To gain further insight into the mechanisms inducing senescence by CDK4/6  
396 inhibitors, we performed a genome wide CRISPR/Cas9 screen. This would allow us to

397 identify genes whose loss of function prevented the cell cycle arrest induced by Palbo  
398 treatment in MCF7 cells, thus identifying genes that can predicted a lack of response to  
399 Palbo. We found a total of eighteen sgRNA enriched after two weeks of treatment, targeting  
400 genes which regulate PI3K or p53 signalling pathways, previously known to regulate  
401 senescence or senescence-related phenotypes<sup>54, 55, 56, 57</sup>. However, KEGG analysis  
402 revealed an enrichment for genes whose loss of function regulated the blood coagulation  
403 pathway, suggesting that genes participating in the coagulation cascade (*F9*, *PROZ*) could  
404 regulate senescence induced by Palbociclib.

405 The identification of genes participating in the blood coagulation pathway, is in  
406 accordance with previous publications were it was demonstrated that inflammaging,  
407 hypercoagulability and cellular senescence share common pathways<sup>58</sup>. *F9* participates in  
408 the intrinsic pathway of blood coagulation by converting factor X in its active form regulating  
409 the haemostasis program<sup>59</sup>. Our results, demonstrate not only that *F9* levels are  
410 upregulated and secreted when MCF7 cells are treated with CDK4/6 inhibitors (specially  
411 Palbo and Abema) but also, when human primary fibroblasts are triggered to induce  
412 senescence by expressing the H-RAS<sup>G12V</sup> or when treated with etoposide or Palbociclib.  
413 Furthermore, endothelial cells also express higher levels of *F9* upon senescence induction  
414 when using Palbociclib. Even though the link between senescence and haemostasis is not  
415 fully clear, *Wiley et al.* demonstrated that human fibroblasts undergoing senescence  
416 secrete a subset of haemostasis-related factors as part of the SASP<sup>33</sup>. It is however  
417 interesting to note that they did not find factors implicated in the coagulation pathways  
418 suggesting that maybe different triggers or cell cultures could favour either general  
419 haemostasis or the coagulation pathway specifically.

420 In concordance with our data, the combination of MEK and CDK4/6 inhibitors in  
421 pancreatic adenocarcinoma suppresses cell proliferation and induces the release of SASP  
422 factors enriched in pro-angiogenic proteins promoting tumour vascularization which, in turn,  
423 enhances drug delivery and efficacy<sup>50</sup>. In line with these findings, senescent human



424 primary fibroblasts also release pro-angiogenic factors such as VEGF<sup>60</sup>. Altogether, these  
425 findings prompts us to think that *F9* and the coagulation pathway play an important role in  
426 senescence. In fact, the coagulation pathway has been shown to be upregulated in  
427 senescence<sup>61</sup> and ageing<sup>62, 63</sup> by others. Furthermore, *F9* has been associated with frailty  
428 <sup>64</sup> and is a genetic risk factor estimated to contribute to thrombosis incidence in the elderly<sup>62,</sup>  
429 <sup>65</sup>.

430 Although pro-senescence therapies are considered a potential anti-cancer strategy,  
431 the accumulation of senescent cells in the tissue is deleterious. In fact, the elimination of  
432 senescent cells promotes tumour clearance, tissue regeneration and ameliorates age-  
433 related pathologies<sup>26, 35, 66</sup>. This process is mainly controlled by the recruitment of the  
434 immune system through SASP factors<sup>9, 11, 28, 67</sup> that, in the same line, are able to modify  
435 platelet function, resulting in increased efficacy<sup>68</sup>. Our data show that Palbociclib induces  
436 certain SASP factors in MCF7, but this secretion was partially prevented by *F9* loss of  
437 function. Although more experiments would be needed it is tempting to speculate a role for  
438 *F9* as part of the SASP in recruiting immune cells or regulating platelet function in this  
439 context. In fact, CDK4/6 inhibitors have been shown to enhance T-cell activation<sup>69</sup> and NK  
440 recruitment<sup>67</sup> although a direct role for *F9* has not been described. Interestingly, it has been  
441 show that hepatocyte-derived human coagulation *F9* expression can induce regulatory  
442 CD4<sup>+</sup> T cells in mice<sup>70</sup> suggesting a role for *F9* in regulating immunosurveillance.

443 It is well established that a link between thrombosis and cancer exists<sup>41, 71</sup>. The  
444 expression of the oncogene *MET* in the liver *in vivo* not only causes hepatocarcinogenesis  
445 but also blood hypercoagulation and fatal internal haemorrhage bleeding<sup>40</sup>. In fact, the use  
446 of antiplatelet therapy in liver cancer prevents cross-talk between platelets and immune  
447 cell interaction<sup>72</sup>. Curiously, chemotherapy treatment increases the risk of thrombosis<sup>73</sup>  
448 and a link showing that senescence promotes the adverse effects of chemotherapy and  
449 cancer relapse has been recently shown<sup>29</sup>. It would therefore be interesting to further

450 explore the implication of the coagulation pathway and F9 in particular in the context of  
451 chemotherapy and senescence.

452 In summary, here we provide evidence for the involvement of two different genes  
453 within the coagulation pathway, *F9* and *PROZ*, in regulating senescence in different  
454 contexts. Our results show that *F9* is partially responsible for CDK4/6 inhibitors response  
455 in breast and renal carcinoma *in vitro*. Importantly, we unveiled a correlation between the  
456 levels of F9 and cancer progression studying different cancer related datasets. Altogether,  
457 we believe *F9* could be considered as a potential biomarker to predict CDK4/6 inhibitors  
458 response when used as first line treatment in cancer.

459

460

461

## 462 **EXPERIMENTAL PROCEDURES**

### 463 **Cell culture**

464 All cancer cell lines used in this study were obtained from American Type Culture  
465 Collection (ATCC). Human foreskin fibroblasts (HFFF2) were obtained from Culture  
466 Collections (Public Health England, UK). All cell lines were grown in high glucose  
467 Dulbecco's Modified Eagle Medium (DMEM) (Gibco) except for HCT-116, SK-OV-3,  
468 Capan2 and HT29 that were grown in McCoys 5a medium, SNU-387, NCI-H23, OVCAR-  
469 3 that were grown in RPMI and A549, PC-3 that were grown in F12K medium. All media  
470 was supplemented with 10% foetal bovine serum (FBS) (Thermo Fisher) and 1% of  
471 antibiotic-anti-mycotic (Thermo Fisher). Human umbilical vein endothelial cells (HUVEC)  
472 from pooled donors were purchased from Promocell (Heidelberg, Germany). The cells  
473 were grown in M199 (Life Technologies, Grand Island, NY) with 20% fetal bovine serum  
474 (Labtech, Heathfield, UK), 10U/ml heparin (Sigma, St. Louis, MO), and 30µg/ml endothelial  
475 cell growth supplement (Sigma). Experiments were performed using HUVECs between  
476 passage 3 and 5.

### 477 **Senescence induction**

478 MCF7 cells were treated with different concentrations (100nM, 200nM, 500nM or 1000 nM)  
479 of Palbociclib (PD0332991) (APExBIO), Abemaciclib (LY2835219) (Selleckchem) or  
480 Ribociclib (LEE011) (Selleckchem) and the other cancer cell lines with the indicated  
481 concentration of inhibitor. Human primary fibroblasts (HFFF2) were treated with 50µM of  
482 Etoposide (Sigma-Aldrich) for 2 days and cells collected at day 7 or treated with 1µM  
483 Palbociclib for 7 days. HFFF2 expressing pLNC-ER:RAS vector, were induced to  
484 senescence by adding 200nM 4-hydroxytamoxifen (4OHT) (Sigma-Aldrich) for 6 days. All  
485 treatments were done using DMEM supplemented with 10% FBS and 1% of antibiotic-anti-  
486 mycotic. HUVEC cells were treated with 500nM Palbo for 7 days to induce senescence.

### 487 **F9 recombinant experiments**

488 Recombinant experiments were carried out by using F9 recombinant protein (R&D

489 systems). MCF7 cell line was treated with 10 µg/ml in complete medium for two rounds of  
490 72 hours (total of 6 days treatment). At the end of the experiment cells were fixed with 4%  
491 paraformaldehyde (PFA) and used for immunofluorescence studies.

#### 492 **Retroviral and lentiviral infections**

493 The generation of stable retroviral and lentiviral expression was carried out following  
494 previous studies<sup>8, 34, 35, 74</sup>. Briefly, retroviral particles were generated by transfecting pLNC-  
495 ER:H-RAS<sup>G12V</sup> plasmid and retroviral helper plasmids (vsvg and gag-pol) with  
496 Polyethylenimine (PEI) in HEK293T packaging cells for 48h. Recombinant lentiviral  
497 particles were generated using the second-generation packaging vectors psPAX2 and  
498 pMD2.G using PEI in HEK293T. The supernatant containing retrovirus or lentivirus was  
499 then filtered with 0.45µm filters (Starlab) and applied to HFFF2 cells in the presence of  
500 4µg/ml polybrene (hexadimethrine bromide; Sigma-Aldrich) following 3 rounds of infection.  
501 Cells were subsequently selected with the appropriate antibiotic resistance either 0.5µg/ml  
502 puromycin or 300µg/ml neomycin (Invitrogen). For lentiviral infections with the sgRNA a  
503 pool for the 4 sgRNA (5µg DNA per single sgRNA) targeting a single gene was generated  
504 by transfecting equal amounts of DNA and the packaging vectors psPAX2 and pMD2.G.  
505 Infection was performed as described earlier for lentivirus.

#### 506 **Genome-wide CRISPR/Cas9 library amplification and sequencing**

507 The Human CRISPR knockout Pooled Library (GeCKOv2) was purchased from Addgene  
508 (#1000000048) and amplified using *E. coli* competent cells. The library contains 123,411  
509 unique sgRNA sequences targeting 19,050 genes within the human genome. After  
510 amplifying the library as described<sup>31, 75</sup>, viral particles were produced in HEK293T cells and  
511 MCF7 cells were infected at a multiplicity of infection (MOI) of 0.2 - 0.5 following the  
512 lentiviral protocol previously described<sup>31, 75</sup>. Cells were selected with puromycin (1µg/ml)  
513 for 72h after the GeCKO library infection. After selection, cells were plated at low density  
514 and treated with 200nM Palbociclib for 14 days to either determine proliferation or sent  
515 DNA for genomic DNA sequencing. Crystal violet staining was used to assess cell

516 proliferation and determine the library bypass efficacy. After MCF7 cell infection and  
517 selection with the GeCKO library, genomic DNA was extracted at days 0 and day 14 after  
518 infection using the QIAmp Blood and Cell Culture DNA midi kit (Qiagen). The PCR was  
519 performed by QMUL Genome Centre.

520 The accession number for the sequencing data reported in this paper is GEO: XXXXXXXX.

#### 521 **CRISPR sgRNA generation**

522 The online guide design tool (<http://crispr.mit.edu>) was used to identify sgRNA sequences.

523 The highest scoring guides were selected. Primers for the sgRNA sequences were ordered  
524 and the complementary sequences annealed at 37C for 30min, followed by incubating the  
525 annealed primers at 95C for 5 min and then ramped down to 25C at 5C degrees per min.

526 The annealed synthetic sgRNA oligonucleotides were cloned into pLentiCRISPRv2 vector  
527 (Addgene #52961) at BsmBI restriction sites. The sgRNA sequences used in this study  
528 are:

|     |           |                          |
|-----|-----------|--------------------------|
| 529 | sgF9#1    | GCAGCGCGTGAACATGATCATGG  |
| 530 | sgF9#2    | CACTGAGTAGATATCCTAAAAGG  |
| 531 | sgF9#3    | ATGATCATGGCAGAATCACCAGG  |
| 532 | sgF9#4    | CTAAAAGGCAGATGGTGATGAGG  |
| 533 | sgLPAR5#1 | CCCAGAGGGCTAGCGCGTTGAGG  |
| 534 | sgLPAR5#2 | CCAGAGGGCTAGCGCGTTGAGGG  |
| 535 | sgLPAR5#3 | GGAAGATGGCGCCCGTTCGTCTGG |
| 536 | sgLPAR5#4 | GCGTAGTAGGAGAGACGAACGGG  |
| 537 | sgPROZ#1  | TGAGGGCTCCACACGATGGAGGG  |
| 538 | sgPROZ#2  | GGTCCTCGCCCTCCATCGTGTGG  |
| 539 | sgPROZ#3  | CTGAGGGCTCCACACGATGGAGG  |
| 540 | sgPROZ#4  | GCTCCACACGATGGAGGGCGAGG  |
| 541 | sgMOGAT#1 | CCGCAATGTAGTTCCGAGAGGGG  |
| 542 | sgMOGAT#2 | GCCCGCAATGTAGTTCCGAGAGG  |

543 sgMOGAT#3 GTTCCGCAGTAACAGCGTGAAGG

544 sgMOGAT#4 GCTGTTACTGCGGAACCGAAAGG

545 sgRB#3 GGTGGCGGCCGTTTTTCGGGGGG

546 sgRB#4 CGGCGGTGGCGGCCGTTTTTCGG

547 To identify positive clones the primer hU6 CRISPR 5'-GAGGGCCTATTTCCCATGATT-  
548 3' was used in combination with the reverse primer for each specific clone and isolated  
549 clones were SANGER sequenced.

#### 550 **Cell proliferation experiments**

551 For cell proliferation studies, 100 cells were plated in each well of a 96-well plate and  
552 treated with CDK inhibitors (Palbociclib, Abemaciclib, Ribociclib) for 0, 6, 15, 20 days. The  
553 medium was replaced every other day either with drug or drug-free medium. For replating  
554 experiments, cells were treated with Palbociclib for 6 days, counted and replated at low  
555 density in a 96 well plate until day 20. Drug-withdrawal was performed by treating the cells  
556 6 days in the presence of Palbociclib and removing the drug from day 6 to day 20. Cells  
557 were then fixed, stained with 0.5% crystal violet, solubilized with 30% acetic acid solution  
558 and absorbance was measured at 570nm.

559 For colony formation assay, 5000 cells plated in each well of a six-well plate, treated with  
560 CDK inhibitors 20-30 days (once control reaches confluence). Cells were then washed with  
561 PBS, stained with crystal violet and scanned to obtain the pictures.

#### 562 **CDK4/6 inhibitors dose-response studies**

563 Dose-response studies were carried out using the panel of cancer cell lines listed in the  
564 Cell Culture section. Cells were plated in a 96 well plate at 500-1000 cells/well (based on  
565 seeding density calculations) and treated with increasing concentrations (0.25 - 5  $\mu$ M) of  
566 Palbociclib, Abemaciclib and Ribociclib. Medium containing the drugs or DMSO was  
567 replaced every other day during 10 days. The plates were then stained with 0.5% crystal  
568 violet solution and scanned. Crystal violet quantification was performed by solubilizing  
569 crystal violet staining with 30% acetic acid and measuring the absorbance at 570 nm.

570 **β-galactosidase staining**

571 Cells were washed with PBS and fixed with 0.05% (w/v) glutaraldehyde (in PBS) for 15  
572 min at room temperature. Cells were washed a second time with PBS and incubated with  
573 5-bromo-4-chloro-3-indolyl-beta-D-galacto-pyranoside (X-gal) solution for 1h at 37°C.  
574 Cells were imaged after 12 - 24h using a light microscope (Nikon) at 20X magnification  
575 and single representative images of each well were taken. Fluorescent β-Galactosidase  
576 was performed according to the manufacturer's instructions using the following commercial  
577 kit (Sigma-Aldrich, #F2756). Briefly, 33μM of the β-gal substrate C<sub>12</sub>FDG (Fluorescein di-  
578 β-D-galactopyranose) (F2756 Sigma-Aldrich) was added to the cells for 8h at 37°C, After,  
579 the cells were washed with PBS and fixed with 4% PFA.

580 **RNA extraction, cDNA synthesis and qPCR**

581 Total RNA was extracted using TRIzol Reagent (ThermoFisher) according to the  
582 manufacturer's instructions. cDNA synthesis was performed using High Capacity cDNA  
583 Reverse Transcriptase kit (ThermoFisher). qPCR reactions were performed using SYBR  
584 Green PCR Master Mix (Applied Biosystems) on a 7500 Fast System RealTime PCR cyclor  
585 (Applied Biosystems). Primer sequences used in this study are:

586 F9 Forward 5'-CAGTGTTTCAGAGCCAAGCAA-3'

587 F9 Reverse 5'-CATGGTGAACACGAAACCAG-3'

588 PROZ Forward 5'-CACCCCTGAGAAAGACTTCG-3'

589 PROZ Reverse 5'-GGAGCCTCTGTGTTCTCTGG-3'

590 RB Forward 5'-AACCCAGGAAGGAATGGCT-3'

591 RB Reverse 5'-CTGCGTTCAGGTGATTGATG-3'

592 IL8 Forward 5'-GAGTGGACCACACTGCGCCA-3'

593 IL8 Reverse 5'-TCCACAACCCTCTGCACCCAGT-3'

594 IL6 Forward 5'-CCAGGAGCCCAGCTATGAAC-3'

595 IL6 Reverse 5'-CCCAGGGAGAAGGCAACTG-3'

596 CCL20 Forward 5'-GGCGAATCAGAAGCAGCAAGCAAC-3'

597 CCL20 Reverse 5'-ATTGGCCAGCTGCCGTGTGAA-3'  
598 IL1A Forward 5'-AGTGCTGCTGAAGGAGATGCCTGA-3'  
599 IL1A Reverse 5'-CCCCTGCCAAGCACACCCAGTA-3'  
600 IL1B Forward 5'-TGCACGCTCCGGGACTCACA-3'  
601 IL1B Reverse 5'-CATGGAGAACACCACTTGTGCTCC-3'  
602 CDKN1A Forward 5'-CCTGTCACTGTCTTGTACCCT-3'  
603 CDKN1A Reverse 5'-GCGTTTGGAGTGGTAGAAATCT-3'  
604 ACTIN Forward 5'-GCCCTGAGGCACTCTTCCA-3'  
605 ACTIN Reverse 5'-CGGATGTCCACGTCACACTTC-3'  
606 RSP14 Forward 5'-CTGCGAGTGCTGTCAGAGG-3'  
607 RSP14 Reverse 5'-TCACCGCCCTACACATCAAAC-3'

#### 608 **Protein lysis and western blot**

609 Cells were lysed in ice-cold Lysis Buffer 6 (R&D systems) supplemented with 10  $\mu$ L/mL of  
610 protease inhibitor cocktail. Total protein content was determined by Precision Red Reagent  
611 (Sigma) protein assay. Twenty micrograms of total protein were separated on 10% SDS-  
612 PAGE and transferred to a polyvinylidene fluoride (PVDF) membrane (Millipore Co.,  
613 Bedford, MA). Protein transfer was checked by staining the membrane with Ponceau S red  
614 (Sigma-Aldrich). The membrane was then blocked using 5% bovine serum albumin (BSA)  
615 (Sigma) or 5% milk (Sigma) in PBS supplemented with 0.05% Tween-20 (Sigma) (PBST).  
616 Primary antibodies RB1 (BD; Cat# 554136) and  $\beta$ -Actin (Abcam, Cat# ab8226) were  
617 incubated overnight at 4C. After four washes with PBST, the membrane was incubated  
618 with a secondary antibody for 1h at room temperature. Protein bands were detected using  
619 SuperSignal West Pico PLUS Chemiluminescent Substrate (Thermo Fisher Scientific)  
620 using the ChemiDoc XRS+ System (Bio-Rad).

#### 621 **Immunofluorescence**

622 Cells were grown in a 96-well plate and fixed with 4% paraformaldehyde for 10 min at RT.  
623 Cells were then washed twice with PBS and permeabilized by incubating with 0.4% Triton



624 X-100 (xx) in PBS for 10 min at RT. After a PBS wash, cells were blocked 30 min at RT  
625 using 1% BSA in PBS supplemented with 0.1% Tween-20 (PBST). Primary antibodies  
626 (details found at the end of the section) were diluted in 1% BSA-PBST and incubated  
627 overnight. For BrdU staining, cells were treated with DNaseI and MgCl<sub>2</sub> simultaneously  
628 with the primary antibody. Cells were then washed with PBS and incubated with their  
629 respective secondary antibody for 1h at RT. Nuclei were stained with DAPI (Sigma-Aldrich).  
630 Images were acquired using INCell 2200 automated 991 microscope (GE) and INCell 2200  
631 Developer software version 1.8 (GE) was used for image analysis. Antibody used in this  
632 study are: p21<sup>CIP</sup> (Abcam, Cat# ab109520), Ki67 (Abcam, Cat# ab92742), BrdU (Abcam,  
633 ab6326; 1:500) and F9 (Proteintech, Cat# 21481-1-AP).

#### 634 **Conditioned media experiments**

635 Donor cells (HFFF2 iRAS) were treated in the presence or absence of 200nM 4-  
636 hydroxytamoxifen (4OHT) (Sigma-Aldrich) for 3 days, washed and replenished with fresh  
637 media to prevent carrying the 4OHT. Conditioned medium (CM) was collected and  
638 supplemented to 10% FBS and added to MCF7 recipient cells for 72h. MCF7 cells were  
639 pre-treated in the presence or absence of 500nM Palbociclib prior to adding the CM.

#### 640 **Statistics**

641 Dataset analysis were performed using R2: Genomics Analysis and Visualization Platform  
642 (<http://r2.amc.nl>). STRING interactions were identified using the functional protein  
643 association networks (<https://string-db.org/>). Kyoto Encyclopedia of Genes and Genomes  
644 (KEGG) pathway analysis was performed using Panther pathway analysis  
645 (<http://www.pantherdb.org>). A  $p < 0.05$  is considered significant throughout the paper as  
646 follows: \* $p < 0.05$ ; \*\* $p < 0.01$ ; \*\*\* $p < 0.001$ .

647

648

649 **AUTHOR CONTRIBUTIONS**

650 A.O. conceived and designed the study. P.C.F. performed most of the experiments with  
651 the help of O.E. and J.F.L. M.B. amplified the sgRNA library and carried out the GeCKOv2  
652 whole genome wide screen. T.P.M. and T.D.N. performed the endothelial cells  
653 experiments. M.D.M. provided reagents. P.C.F. and A.O. designed the experiments and  
654 wrote the paper. All the authors discussed the results and commented on the manuscript.

655

656 **ACKNOWLEDGEMENTS**

657 We are extremely grateful to Belen Pan-Castillo for very useful scientific discussions on  
658 the project. We want to thank the Queen Mary University of London Genome Centre, Dr.  
659 Luke Gammon and Dr. Gary Warnes for technical support. This paper was funded by the  
660 BBSRC (BB/P000223/1), The Royal Society (RG170399) and Barts Charity (MGU0497)  
661 grants to A.O. M.M. was funded by PI19/00145 from the Health Institute 'Carlos III' (ISCIII,  
662 Spain). P.C.F. and J.F.L. were funded by Xunta de Galicia (INB606B 2017/014 and  
663 ED481B 2017/117 respectively). M.B. was funded by MRC (MR/K501372/1). T.P.M. was  
664 funded by a QMUL funded PhD programme and T.D.N.'s lab is currently funded by a Barts  
665 Charity project grant (MGU0534). P.C.F. is currently funded by GAIN (IN607B2020/12)  
666 Xunta de Galicia.

667

668 **CONFLICT OF INTEREST**

669 A.O. forms part of the Starklabs Scientific Advisory Board and has an unrelated project  
670 funded by Starklabs.

671

672

673 **REFERENCES**

- 674 1. Malumbres M, Barbacid M. Cell cycle, CDKs and cancer: a changing paradigm. *Nat Rev*  
675 *Cancer* 2009, **9**(3): 153-166.  
676
- 677 2. O'Leary B, Finn RS, Turner NC. Treating cancer with selective CDK4/6 inhibitors. *Nat Rev*  
678 *Clin Oncol* 2016, **13**(7): 417-430.  
679
- 680 3. Wagner V, Gil J. Senescence as a therapeutically relevant response to CDK4/6 inhibitors.  
681 *Oncogene* 2020, **39**(29): 5165-5176.  
682
- 683 4. Dorr JR, Yu Y, Milanovic M, Beuster G, Zasada C, Dabritz JH, *et al.* Synthetic lethal  
684 metabolic targeting of cellular senescence in cancer therapy. *Nature* 2013, **501**(7467): 421-425.  
685
- 686 5. Spring LM, Wander SA, Andre F, Moy B, Turner NC, Bardia A. Cyclin-dependent kinase 4  
687 and 6 inhibitors for hormone receptor-positive breast cancer: past, present, and future. *Lancet* 2020,  
688 **395**(10226): 817-827.  
689
- 690 6. Salvador-Barbero B, Alvarez-Fernandez M, Zapatero-Solana E, El Bakkali A, Menendez  
691 MDC, Lopez-Casas PP, *et al.* CDK4/6 Inhibitors Impair Recovery from Cytotoxic Chemotherapy in  
692 Pancreatic Adenocarcinoma. *Cancer Cell* 2020, **38**(4): 584.  
693
- 694 7. Asghar U, Witkiewicz AK, Turner NC, Knudsen ES. The history and future of targeting  
695 cyclin-dependent kinases in cancer therapy. *Nat Rev Drug Discov* 2015, **14**(2): 130-146.  
696
- 697 8. Rapisarda V, Borghesan M, Miguela V, Encheva V, Snijders AP, Lujambio A, *et al.* Integrin  
698 Beta 3 Regulates Cellular Senescence by Activating the TGF-beta Pathway. *Cell Rep* 2017, **18**(10):  
699 2480-2493.  
700
- 701 9. Goel S, DeCristo MJ, Watt AC, BrinJones H, Sceneay J, Li BB, *et al.* CDK4/6 inhibition  
702 triggers anti-tumour immunity. *Nature* 2017, **548**(7668): 471-475.  
703
- 704 10. Wang H, Nicolay BN, Chick JM, Gao X, Geng Y, Ren H, *et al.* The metabolic function of  
705 cyclin D3-CDK6 kinase in cancer cell survival. *Nature* 2017, **546**(7658): 426-430.  
706
- 707 11. Schaer DA, Beckmann RP, Dempsey JA, Huber L, Forest A, Amaladas N, *et al.* The  
708 CDK4/6 Inhibitor Abemaciclib Induces a T Cell Inflamed Tumor Microenvironment and Enhances  
709 the Efficacy of PD-L1 Checkpoint Blockade. *Cell Rep* 2018, **22**(11): 2978-2994.  
710
- 711 12. Turner NC, Slamon DJ, Ro J, Bondarenko I, Im SA, Masuda N, *et al.* Overall Survival with  
712 Palbociclib and Fulvestrant in Advanced Breast Cancer. *N Engl J Med* 2018, **379**(20): 1926-1936.  
713
- 714 13. Dickler MN, Tolaney SM, Rugo HS, Cortes J, Dieras V, Patt D, *et al.* MONARCH 1, A Phase  
715 II Study of Abemaciclib, a CDK4 and CDK6 Inhibitor, as a Single Agent, in Patients with Refractory  
716 HR(+)/HER2(-) Metastatic Breast Cancer. *Clin Cancer Res* 2017, **23**(17): 5218-5224.  
717

- 718 14. Tolaney SM, Guo H, Pernas S, Barry WT, Dillon DA, Ritterhouse L, *et al.* Seven-Year  
719 Follow-Up Analysis of Adjuvant Paclitaxel and Trastuzumab Trial for Node-Negative, Human  
720 Epidermal Growth Factor Receptor 2-Positive Breast Cancer. *J Clin Oncol* 2019, **37**(22): 1868-1875.  
721
- 722 15. Alvarez-Fernandez M, Malumbres M. Mechanisms of Sensitivity and Resistance to CDK4/6  
723 Inhibition. *Cancer Cell* 2020, **37**(4): 514-529.  
724
- 725 16. Finn RS, Crown JP, Lang I, Boer K, Bondarenko IM, Kulyk SO, *et al.* The cyclin-dependent  
726 kinase 4/6 inhibitor palbociclib in combination with letrozole versus letrozole alone as first-line  
727 treatment of oestrogen receptor-positive, HER2-negative, advanced breast cancer (PALOMA-  
728 1/TRIO-18): a randomised phase 2 study. *Lancet Oncol* 2015, **16**(1): 25-35.  
729
- 730 17. Wilkie J, Schickli MA, Berger MJ, Lustberg M, Reinbolt R, Noonan A, *et al.* Progression-  
731 Free Survival for Real-World Use of Palbociclib in Hormone Receptor-Positive Metastatic Breast  
732 Cancer. *Clin Breast Cancer* 2020, **20**(1): 33-40.  
733
- 734 18. Turner NC, Huang Bartlett C, Cristofanilli M. Palbociclib in Hormone-Receptor-Positive  
735 Advanced Breast Cancer. *N Engl J Med* 2015, **373**(17): 1672-1673.  
736
- 737 19. Pandey K, An HJ, Kim SK, Lee SA, Kim S, Lim SM, *et al.* Molecular mechanisms of  
738 resistance to CDK4/6 inhibitors in breast cancer: A review. *Int J Cancer* 2019, **145**(5): 1179-1188.  
739
- 740 20. Finn RS, Dering J, Conklin D, Kalous O, Cohen DJ, Desai AJ, *et al.* PD 0332991, a selective  
741 cyclin D kinase 4/6 inhibitor, preferentially inhibits proliferation of luminal estrogen receptor-positive  
742 human breast cancer cell lines in vitro. *Breast Cancer Res* 2009, **11**(5): R77.  
743
- 744 21. Anders L, Ke N, Hydbring P, Choi YJ, Widlund HR, Chick JM, *et al.* A systematic screen for  
745 CDK4/6 substrates links FOXM1 phosphorylation to senescence suppression in cancer cells.  
746 *Cancer Cell* 2011, **20**(5): 620-634.  
747
- 748 22. McCartney A, Migliaccio I, Bonechi M, Biagioni C, Romagnoli D, De Luca F, *et al.*  
749 Mechanisms of Resistance to CDK4/6 Inhibitors: Potential Implications and Biomarkers for Clinical  
750 Practice. *Front Oncol* 2019, **9**: 666.  
751
- 752 23. Munoz-Espin D, Serrano M. Cellular senescence: from physiology to pathology. *Nat Rev*  
753 *Mol Cell Biol* 2014, **15**(7): 482-496.  
754
- 755 24. Faget DV, Ren Q, Stewart SA. Unmasking senescence: context-dependent effects of SASP  
756 in cancer. *Nat Rev Cancer* 2019, **19**(8): 439-453.  
757
- 758 25. Lee S, Schmitt CA. The dynamic nature of senescence in cancer. *Nat Cell Biol* 2019, **21**(1):  
759 94-101.  
760
- 761 26. Dolgin E. Send in the senolytics. *Nat Biotechnol* 2020.  
762

- 763 27. Coppe JP, Desprez PY, Krtolica A, Campisi J. The senescence-associated secretory  
764 phenotype: the dark side of tumor suppression. *Annu Rev Pathol* 2010, **5**: 99-118.  
765
- 766 28. Fafian-Labora JA, O'Loghlen A. Classical and Nonclassical Intercellular Communication in  
767 Senescence and Ageing. *Trends Cell Biol* 2020, **30**(8): 628-639.  
768
- 769 29. Demaria M, O'Leary MN, Chang J, Shao L, Liu S, Alimirah F, *et al.* Cellular Senescence  
770 Promotes Adverse Effects of Chemotherapy and Cancer Relapse. *Cancer Discov* 2017, **7**(2): 165-  
771 176.  
772
- 773 30. Hamm CA, Moran D, Rao K, Trusk PB, Pry K, Sausen M, *et al.* Genomic and Immunological  
774 Tumor Profiling Identifies Targetable Pathways and Extensive CD8+/PDL1+ Immune Infiltration in  
775 Inflammatory Breast Cancer Tumors. *Mol Cancer Ther* 2016, **15**(7): 1746-1756.  
776
- 777 31. Shalem O, Sanjana NE, Hartenian E, Shi X, Scott DA, Mikkelsen T, *et al.* Genome-scale  
778 CRISPR-Cas9 knockout screening in human cells. *Science* 2014, **343**(6166): 84-87.  
779
- 780 32. Wang T, Wei JJ, Sabatini DM, Lander ES. Genetic screens in human cells using the  
781 CRISPR-Cas9 system. *Science* 2014, **343**(6166): 80-84.  
782
- 783 33. Wiley CD, Liu S, Limbad C, Zawadzka AM, Beck J, Demaria M, *et al.* SILAC Analysis  
784 Reveals Increased Secretion of Hemostasis-Related Factors by Senescent Cells. *Cell Rep* 2019,  
785 **28**(13): 3329-3337 e3325.  
786
- 787 34. Borghesan M, Fafian-Labora J, Eleftheriadou O, Carpintero-Fernandez P, Paez-Ribes M,  
788 Vizcay-Barrena G, *et al.* Small Extracellular Vesicles Are Key Regulators of Non-cell Autonomous  
789 Intercellular Communication in Senescence via the Interferon Protein IFITM3. *Cell Rep* 2019,  
790 **27**(13): 3956-3971 e3956.  
791
- 792 35. Fafian-Labora JA, Rodriguez-Navarro JA, O'Loghlen A. Small Extracellular Vesicles Have  
793 GST Activity and Ameliorate Senescence-Related Tissue Damage. *Cell Metab* 2020, **32**(1): 71-86  
794 e75.  
795
- 796 36. Sanada F, Taniyama Y, Muratsu J, Otsu R, Iwabayashi M, Carracedo M, *et al.* Activated  
797 Factor X Induces Endothelial Cell Senescence Through IGFBP-5. *Sci Rep* 2016, **6**: 35580.  
798
- 799 37. Boilard E, Nigrovic PA, Larabee K, Watts GF, Coblyn JS, Weinblatt ME, *et al.* Platelets  
800 amplify inflammation in arthritis via collagen-dependent microparticle production. *Science* 2010,  
801 **327**(5965): 580-583.  
802
- 803 38. George JN. Platelets. *Lancet* 2000, **355**(9214): 1531-1539.  
804
- 805 39. Valencia T, Kim JY, Abu-Baker S, Moscat-Pardos J, Ahn CS, Reina-Campos M, *et al.*  
806 Metabolic reprogramming of stromal fibroblasts through p62-mTORC1 signaling promotes  
807 inflammation and tumorigenesis. *Cancer Cell* 2014, **26**(1): 121-135.  
808

- 809 40. Boccaccio C, Sabatino G, Medico E, Girolami F, Follenzi A, Reato G, *et al.* The MET  
810 oncogene drives a genetic programme linking cancer to haemostasis. *Nature* 2005, **434**(7031): 396-  
811 400.  
812
- 813 41. Zagar TM, Cardinale DM, Marks LB. Breast cancer therapy-associated cardiovascular  
814 disease. *Nat Rev Clin Oncol* 2016, **13**(3): 172-184.  
815
- 816 42. Sheffer M, Bacolod MD, Zuk O, Giardina SF, Pincas H, Barany F, *et al.* Association of  
817 survival and disease progression with chromosomal instability: a genomic exploration of colorectal  
818 cancer. *Proc Natl Acad Sci U S A* 2009, **106**(17): 7131-7136.  
819
- 820 43. Pawitan Y, Bjohle J, Amler L, Borg AL, Egyhazi S, Hall P, *et al.* Gene expression profiling  
821 spares early breast cancer patients from adjuvant therapy: derived and validated in two population-  
822 based cohorts. *Breast Cancer Res* 2005, **7**(6): R953-964.  
823
- 824 44. Konecny GE, Winterhoff B, Kolarova T, Qi J, Manivong K, Dering J, *et al.* Expression of p16  
825 and retinoblastoma determines response to CDK4/6 inhibition in ovarian cancer. *Clin Cancer Res*  
826 2011, **17**(6): 1591-1602.  
827
- 828 45. Wiedemeyer WR, Dunn IF, Quayle SN, Zhang J, Chheda MG, Dunn GP, *et al.* Pattern of  
829 retinoblastoma pathway inactivation dictates response to CDK4/6 inhibition in GBM. *Proc Natl Acad*  
830 *Sci U S A* 2010, **107**(25): 11501-11506.  
831
- 832 46. Cen L, Carlson BL, Schroeder MA, Ostrem JL, Kitange GJ, Mladek AC, *et al.* p16-Cdk4-Rb  
833 axis controls sensitivity to a cyclin-dependent kinase inhibitor PD0332991 in glioblastoma xenograft  
834 cells. *Neuro Oncol* 2012, **14**(7): 870-881.  
835
- 836 47. Clark AS, Karasic TB, DeMichele A, Vaughn DJ, O'Hara M, Perini R, *et al.* Palbociclib  
837 (PD0332991)-a Selective and Potent Cyclin-Dependent Kinase Inhibitor: A Review of  
838 Pharmacodynamics and Clinical Development. *JAMA Oncol* 2016, **2**(2): 253-260.  
839
- 840 48. Cristofanilli M, Turner NC, Bondarenko I, Ro J, Im SA, Masuda N, *et al.* Fulvestrant plus  
841 palbociclib versus fulvestrant plus placebo for treatment of hormone-receptor-positive, HER2-  
842 negative metastatic breast cancer that progressed on previous endocrine therapy (PALOMA-3):  
843 final analysis of the multicentre, double-blind, phase 3 randomised controlled trial. *Lancet Oncol*  
844 2016, **17**(4): 425-439.  
845
- 846 49. Zou X, Ray D, Aziyu A, Christov K, Boiko AD, Gudkov AV, *et al.* Cdk4 disruption renders  
847 primary mouse cells resistant to oncogenic transformation, leading to Arf/p53-independent  
848 senescence. *Genes Dev* 2002, **16**(22): 2923-2934.  
849
- 850 50. Ruscetti M, Morris JPt, Mezzadra R, Russell J, Leibold J, Romesser PB, *et al.* Senescence-  
851 Induced Vascular Remodeling Creates Therapeutic Vulnerabilities in Pancreas Cancer. *Cell* 2020,  
852 **181**(2): 424-441 e421.  
853

- 854 51. Hortobagyi GN, Stemmer SM, Burris HA, Yap YS, Sonke GS, Paluch-Shimon S, *et al.*  
855 Ribociclib as First-Line Therapy for HR-Positive, Advanced Breast Cancer. *N Engl J Med* 2016,  
856 **375**(18): 1738-1748.  
857
- 858 52. Hamilton E, Infante JR. Targeting CDK4/6 in patients with cancer. *Cancer Treat Rev* 2016,  
859 **45**: 129-138.  
860
- 861 53. Goetz MP, Toi M, Campone M, Sohn J, Paluch-Shimon S, Huober J, *et al.* MONARCH 3:  
862 Abemaciclib As Initial Therapy for Advanced Breast Cancer. *J Clin Oncol* 2017, **35**(32): 3638-3646.  
863
- 864 54. Bent EH, Gilbert LA, Hemann MT. A senescence secretory switch mediated by  
865 PI3K/AKT/mTOR activation controls chemoprotective endothelial secretory responses. *Genes Dev*  
866 2016, **30**(16): 1811-1821.  
867
- 868 55. Xu Y, Li N, Xiang R, Sun P. Emerging roles of the p38 MAPK and PI3K/AKT/mTOR  
869 pathways in oncogene-induced senescence. *Trends Biochem Sci* 2014, **39**(6): 268-276.  
870
- 871 56. Kasthuber ER, Lowe SW. Putting p53 in Context. *Cell* 2017, **170**(6): 1062-1078.  
872
- 873 57. Hafner A, Bulyk ML, Jambhekar A, Lahav G. The multiple mechanisms that regulate p53  
874 activity and cell fate. *Nat Rev Mol Cell Biol* 2019, **20**(4): 199-210.  
875
- 876 58. Sanada F, Taniyama Y, Muratsu J, Otsu R, Shimizu H, Rakugi H, *et al.* Source of Chronic  
877 Inflammation in Aging. *Front Cardiovasc Med* 2018, **5**: 12.  
878
- 879 59. Chapin JC, Hajjar KA. Fibrinolysis and the control of blood coagulation. *Blood Rev* 2015,  
880 **29**(1): 17-24.  
881
- 882 60. Acosta JC, Banito A, Wuestefeld T, Georgilis A, Janich P, Morton JP, *et al.* A complex  
883 secretory program orchestrated by the inflammasome controls paracrine senescence. *Nat Cell Biol*  
884 2013, **15**(8): 978-990.  
885
- 886 61. De Cecco M, Ito T, Petrashen AP, Elias AE, Skvir NJ, Criscione SW, *et al.* L1 drives IFN in  
887 senescent cells and promotes age-associated inflammation. *Nature* 2019, **566**(7742): 73-78.  
888
- 889 62. Wilkerson WR, Sane DC. Aging and thrombosis. *Semin Thromb Hemost* 2002, **28**(6): 555-  
890 568.  
891
- 892 63. Franchini M. Hemostasis and aging. *Crit Rev Oncol Hematol* 2006, **60**(2): 144-151.  
893
- 894 64. Sathyan S, Ayers E, Gao T, Milman S, Barzilai N, Verghese J. Plasma proteomic profile of  
895 frailty. *Aging Cell* 2020: e13193.  
896

- 897 65. Engbers MJ, van Hylckama Vlieg A, Rosendaal FR. Venous thrombosis in the elderly:  
898 incidence, risk factors and risk groups. *J Thromb Haemost* 2010, **8**(10): 2105-2112.  
899
- 900 66. Guccini I, Revandkar A, D'Ambrosio M, Colucci M, Pasquini E, Mosole S, *et al.* Senescence  
901 Reprogramming by TIMP1 Deficiency Promotes Prostate Cancer Metastasis. *Cancer Cell* 2021,  
902 **39**(1): 68-82 e69.  
903
- 904 67. Ruscetti M, Leibold J, Bott MJ, Fennell M, Kulick A, Salgado NR, *et al.* NK cell-mediated  
905 cytotoxicity contributes to tumor control by a cytostatic drug combination. *Science* 2018, **362**(6421):  
906 1416-1422.  
907
- 908 68. Munoz-Espin D, Rovira M, Galiana I, Gimenez C, Lozano-Torres B, Paez-Ribes M, *et al.* A  
909 versatile drug delivery system targeting senescent cells. *EMBO Mol Med* 2018, **10**(9).  
910
- 911 69. Deng J, Wang ES, Jenkins RW, Li S, Dries R, Yates K, *et al.* CDK4/6 Inhibition Augments  
912 Antitumor Immunity by Enhancing T-cell Activation. *Cancer Discov* 2018, **8**(2): 216-233.  
913
- 914 70. Mingozi F, Liu YL, Dobrzynski E, Kaufhold A, Liu JH, Wang Y, *et al.* Induction of immune  
915 tolerance to coagulation factor IX antigen by in vivo hepatic gene transfer. *J Clin Invest* 2003,  
916 **111**(9): 1347-1356.  
917
- 918 71. Ashrani AA, Gullerud RE, Petterson TM, Marks RS, Bailey KR, Heit JA. Risk factors for  
919 incident venous thromboembolism in active cancer patients: A population based case-control study.  
920 *Thromb Res* 2016, **139**: 29-37.  
921
- 922 72. Malehmir M, Pfister D, Gallage S, Szydlowska M, Inverso D, Kotsiliti E, *et al.* Platelet  
923 GPIIb/IIIa is a mediator and potential interventional target for NASH and subsequent liver cancer.  
924 *Nat Med* 2019, **25**(4): 641-655.  
925
- 926 73. Heit JA, Mohr DN, Silverstein MD, Petterson TM, O'Fallon WM, Melton LJ, 3rd. Predictors  
927 of recurrence after deep vein thrombosis and pulmonary embolism: a population-based cohort study.  
928 *Arch Intern Med* 2000, **160**(6): 761-768.  
929
- 930 74. Fafian-Labora J, Carpintero-Fernandez P, Jordan SJD, Shikh-Bahaei T, Abdullah SM,  
931 Mahenthiran M, *et al.* FASN activity is important for the initial stages of the induction of senescence.  
932 *Cell Death Dis* 2019, **10**(4): 318.  
933
- 934 75. Sanjana NE, Shalem O, Zhang F. Improved vectors and genome-wide libraries for CRISPR  
935 screening. *Nat Methods* 2014, **11**(8): 783-784.  
936  
937  
938  
939



940 **FIGURE LEGENDS**

941 **Figure 1. CRISPR/Cas9 screening identifies candidate genes implicated in**  
942 **Palbociclib cell cycle arrest. (A)** Schematic representation of the proof-of-concept  
943 genome wide screen performed in MCF7 using the GeCKOv2 pooled sgRNA library. Cells  
944 were infected with the library (CRISPR/Cas9) or the vector control (control), selected with  
945 puromycin and treated with 200nM of Palbociclib (Palbo) for 14 days. **(B)** MCF7 cells  
946 expressing either the empty vector (C) or the GeCKO library after 14 days of 200nM Palbo  
947 treatment were stained with crystal violet. A representative experiment of 2 independent  
948 experiments is shown. **(C)** Genomic DNA (gDNA) sequencing data showing the  
949 enrichment of sgRNA after two weeks of 200nM Palbo treatment. Data show a  
950 representative experiment from 2 independent experiments. Statistically significant  
951 ( $p < 0.05$ ) transformed RPKM is shown. **(D)** sgRNA targeting 18 different genes were found  
952 to be statistically significant following the selection criteria of: (i)  $>2$  FC (fold change)  
953 differential expression between DMSO and day 14 Palbo treatment and, (ii) 3 or more  
954 sgRNA conferring a proliferative advantage. **(E)** STRING protein interaction and **(F)** Kyoto  
955 Encyclopedia of Genes and Genomes (KEGG) analysis for the 18 genes whose sgRNA  
956 were enriched after 14 days Palbo treatment in panel D. **(G)** Violin plot showing all  
957 individual sgRNA within the GECKO library related to the coagulation pathway (5 sgRNAs  
958 for *PROZ* and 6 sgRNA for *F9*) enriched after two weeks Palbo treatment (FC, fold change  
959 RPKM). Median for values is shown for all sgRNA from 2 independent experiments. One  
960 sample t and Wilcoxon test was performed. Related to **Figure S1**.

961

962 **Figure 2. CRISPR/Cas9 screen validation identifies F9 as a regulator of the**  
963 **proliferation arrest induced by Palbo. (A)** Overview of the experimental set-up followed  
964 to validate the identified sgRNA. Briefly, after plating, MCF7 cells were treated with 200nM  
965 Palbo and samples were collected to determine cell number at days 6, 12 and 20 after  
966 Palbo treatment. **(B)** MFC7 cells expressing the indicated sgRNAs were treated with 200

967 nM Palbo for 20 days and collected at different timepoints (0, 6, 12, 20 days) to assess  
968 proliferation. Proliferation curves show that MCF7 expressing sgF9 (orange line) and  
969 sgPROZ (green line) prevented a stable cell cycle arrest compared to Palbo (P) treated  
970 cells (black line - circles). sgRB MCF7 cells treated with Palbo (blue line) were used as a  
971 positive control. The data represent the mean of 3-5 independent experiments. Student's  
972 t-test analysis at day 20 was performed compared to the Palbo treated sample. **(C)** Basal  
973 proliferation rate was determined by quantifying nuclei count after different sgRNA  
974 infections at 20 days of cell culture. Data show the mean  $\pm$  SEM of 2-3 independent  
975 experiments. Two-tailed students t-test compared to the C sample was performed. **(D)**  
976 MCF7 treated with Palbo for 20 days induce an upregulation of *F9* and *PROZ* mRNA levels  
977 as shown by qPCR analysis. Data represent the mean  $\pm$  SEM of 5 independent  
978 experiments. Two-tailed t-test analysis was performed. **(E)** ELISA for F9 protein levels  
979 secreted by MCF7 cells upon DMSO or Palbo treatment for 20 days. Data represent the  
980 mean  $\pm$  SEM of 4 independent experiments. Two-tailed t-test was performed. **(F)**  
981 Representative images and quantification showing that sgF9 prevents the proliferation  
982 arrest induced by Palbo by displaying an increase in the percentage of cells staining  
983 positive for Ki67 (green). Data show the mean  $\pm$  SEM of 3 independent experiments. Two-  
984 tailed t-test analysis comparing to Palbo sample was performed. Scale bar: 50 $\mu$ m. **(G)**  
985 Representative images for BrdU staining of MCF7 cells infected with a construct  
986 expressing two individual shRNA targeting F9 (shF9#3 and shF9#4). sgRB is used as a  
987 positive control. Scale bar: 50 $\mu$ m. See also **Figure S2**.

988

989 **Figure 3. F9 induces senescence and it is endogenously upregulated during**  
990 **senescence. (A)** Heat map of SASP mRNA levels in MCF7 cells control or expressing  
991 sgF9 after 20 days treatment with Palbo. The mean of 2-7 independent biological replicates  
992 is shown. **(B)** *F9* mRNA upregulation by Palbo is prevented when RB is not present (sgRB).  
993 Data show the mean  $\pm$  SEM of 4 independent experiments. One-WAY ANOVA with

994 Dunnett's multiple comparison to Palbo sample was performed. **(C)** mRNA levels of  
995 endogenous *F9* mRNA levels in HFFF2 (human primary fibroblasts) upon the induction of  
996 senescence. OIS (Oncogene-induced senescence) was induced in HFFF2 expressing  
997 ER:H-RAS<sup>G12V</sup> (iRAS) by adding 200nM 4OHT for 6 days (left panel); 50µM etoposide was  
998 added for 2 days and washed out until day 7 to induce DDIS (DNA-damage senescence)  
999 (middle panel); TIS (Therapy-induced senescence) was mimicked by treating with 1µM of  
1000 Palbo for 7 days (right panel). Data represent the mean ± SEM of 2-3 independent  
1001 experiments. Two-tailed student's t-test analysis was performed. **(D)** Representative  
1002 immunofluorescence images and **(E)** IF quantification showing the expression of  
1003 endogenous *F9* (red) in HUVEC (human umbilical vein endothelial cells) upon 7 days  
1004 treatment with 500nM Palbo. Scale bar: 50µm. The data represent the mean ± SEM of 3-  
1005 4 independent experiments. Two-tailed Student's t-test was used to calculate statistical  
1006 significance. **(F) Left panel**, Representative images for BrdU (red) and p21<sup>CIP1</sup> (green) in  
1007 MCF7 treated twice with 10µg/mL of recombinant *F9* (rF9) for 6 days. Scale bar: 50 µm. 3  
1008 independent experiments were performed. **Right panel**, The graph shows a reduction in  
1009 the number of cells at the end of the experiment. Mean ± SD of 3 independent experiments  
1010 is shown. Two-tailed Student's t-test was used to determine statistical significance. See  
1011 also **Figure S3**.

1012

1013 **Figure 4. CDK4/6 inhibitors induce a cell cycle arrest in different tumour types and**  
1014 **is dependent on *F9* in T47D cells. (A)** Schematic representation of the treatment of MCF7  
1015 cells with 3 different CDK4/6 inhibitors: Palbociclib (Palbo), Ribociclib (Ribo) and  
1016 Abemaciclib (Abema). **(B)** Colony formation assay stained with crystal violet for MCF7  
1017 treated with increasing concentrations of different CDK4/6 inhibitors for 10 days. A  
1018 representative experiment is shown. **(C)** qPCR data show an upregulation of endogenous  
1019 *F9* mRNA levels upon treatment with 500nM Palbo, 500nM Abema or 500nM Ribo. Data  
1020 show the mean ± SEM of 3 independent experiments. Two-tailed t-test analysis is shown

1021 for statistical significance. **(D)** Crystal violet staining for colony formation in MCF7 cells  
1022 expressing sgF9 or sgRB treated with 1 $\mu$ M Abema for 20 days. Representative experiment  
1023 is shown. **(E)** Crystal violet staining shows the effect on proliferation in T47D (ER<sup>+</sup> breast  
1024 cancer cells) and MDA-MB-468 (triple negative breast cancer cell line) expressing sgF9 or  
1025 sgRB and treated with Palbo. Representative staining of 4 independent experiments is  
1026 shown. **(F)** Relative cell count for T47D cells expressing either sgF9 or sgRB. Data show  
1027 the mean  $\pm$  SEM of 7 independent experiments. One Way ANOVA with Dunnett's multiple  
1028 comparisons to Palbo C sample was performed. **(G)** Representative pictures and  
1029 quantification for number of cells presenting SA- $\beta$ -Gal activity in T47D treated with 1 $\mu$ M  
1030 Palbo for 20 days. Two-tailed student's t-test was performed. Scale bar: 50  $\mu$ M. **(H)** ELISA  
1031 for human F9 released to the conditioned media in T47D cell treated with 1 $\mu$ M Palbo for  
1032 20 days. Two-tailed student's t-test was performed. All data represent mean  $\pm$  SEM of 2-7  
1033 independent experiments. Related to **Figure S4**.

1034

#### 1035 **Figure 5. Response to CDK4/6 inhibitors in other cancer cell lines**

1036 **(A)** A panel of 22 cancer cell lines of different origins were treated with increasing  
1037 concentrations of Palbo, Ribo and Abema. **(B)** Crystal violet staining showing the 8 cancer  
1038 cell lines that responded in a statistically significant ( $p < 0.05$ ) and dose-dependent manner  
1039 to more than 2 inhibitors. Representative experiment is shown. **(C)** Venn diagram shows  
1040 that SKMEL28 (melanoma), MCF7 (breast cancer), ACHN (renal adenocarcinoma), HT-  
1041 29 (colon) and SNU-387 (liver) cancer cell lines responded to two or more CDK4/6/  
1042 inhibitors ( $p < 0.05$ ) in a Secondary Screen and were selected for further validation. **(D)** Heat  
1043 map showing F9 mRNA expression in the indicated cancer cells after treatment with  
1044 different CDK4/6 inhibitors. The map represents the mean of 3-5 independent replicates.  
1045 **(E)** ACHN control or expressing shF9#4 stained with crystal violet after 20 days treatment  
1046 with Palbo show a partial proliferation bypass. Representative picture of 3 independent  
1047 experiments. See also **Figure S5**.

1048

1049 **Figure 6. F9 expression is important in different cancer types**

1050 **(A)** *F9* mRNA levels in tumour stroma vs healthy stroma in breast, colon and pancreatic  
1051 cancers. Data are represented as  $-\log_2$  fold change (FC) from<sup>39</sup>. Breast (n=12 samples  
1052 from normal *versus* n=111 from tumour); colon (n=4 samples from normal *versus* n=13  
1053 from tumour); prostate (n=10 samples from normal *versus* n=8 from tumour). T-test  
1054 Student analyses is performed. **(B)** mRNA expression levels of different mRNA transcripts  
1055 from genes implicated in the intrinsic (green bars), extrinsic (orange bars) and transcripts  
1056 common to both pathways (blue bars) in breast cancer. Comparison of tumour stroma  
1057 (n=111) vs healthy stroma (n=12)<sup>39</sup>. **(C)** Schematic representation of panels **(D)** and **(E)**.  
1058 MCF7 cells pre-treated with DMSO or 500nM Palbo were incubated for 72h with the  
1059 conditioned media (CM) of control (-4OHT) (C) or senescent (+4OHT) (SnC) iRAS HFFF2  
1060 primary fibroblasts. Senescence was induced with 200nM 4OHT for 3, washed, incubated  
1061 with fresh media and collected after 3 days. **(D)** *F9* mRNA levels and **(E)** heatmap for other  
1062 SASP transcripts in MCF7 pre-treated with DMSO or 500nM Palbo and incubated with the  
1063 CM from iRAS (-/+ 200nM 4OHT; C or SnC) for 72h. Data show the mean  $\pm$  SEM of 4  
1064 independent replicates for *F9* and the mean of 3-6 independent experiments for the SASP.  
1065 Two-way ANOVA with Dunnett's multiple comparisons analyses was performed. **(F)** *F9*  
1066 expression levels in liver from normal (n=13 samples) and metastatic (n=47) liver. One-  
1067 Way ANOVA analysis was performed to determine statistical significance. Dataset was  
1068 calculated using R2. **(G)** Kaplan-Meier survival curve for high (blue) (n=25) or low (red)  
1069 (n=134) *F9* expression levels and overall survival prognostic in breast cancer. Chi-square  
1070 = 4.07;  $p = 0.04$ <sup>43</sup>. Dataset calculated with R2.

1071

1072 **SUPPLEMENTARY MATERIAL**

1073 **Figure S1. Palbociclib induces a senescent-like phenotype in MCF7 breast cancer**  
1074 **cell line. (A)** Quantification of BrdU incorporation and relative cell number in MFC7 treated

1075 with different concentrations (0.1, 0.2, 0.5 and 1  $\mu$ M) of Palbociclib (Palbo) for 14 days. **(B)**  
1076 SA- $\beta$ -galactosidase (SA- $\beta$ -Gal) staining in MCF7 cells treated with different concentrations  
1077 of Palbo for 7 days. **(C)** The graph represents the percentage of Annexin V positive cells  
1078 after 14 days Palbo treatment with different concentrations. **(D)** Representative images  
1079 (left panel) and quantification (right panel) for SA- $\beta$ -Gal staining in MCF7 cells treated with  
1080 200nM Palbo for 14 days. Graph shows the mean  $\pm$  SEM of 4 independent experiments.  
1081 Two-tailed Student's t-test was used to calculate statistical significance. **(E)** Quantification  
1082 and **(F)** representative pictures of the percentage of p21<sup>CIP</sup> positive cells upon 14 days  
1083 200nM Palbo treatment. Two-tailed Student's t-test was used to calculate statistical  
1084 significance. Scale bar: 50  $\mu$ m. **(G)** Diagram for the lentiCRISPRv2 one vector system used  
1085 in the GeCKO library and to clone individual sgRNAs. The plasmid contains an expression  
1086 cassette for human Cas9 (*hSpCas9*) and the sgRNA in the same vector. Related to **Figure**  
1087 **1**.

1088

1089 **Figure S2. Validation of sgRNA efficiency and proliferative advantage in MCF7 cells.**

1090 **(A)** Relative mRNA expression levels of *PROZ*, *F9* and *RB* in MCF7 after their respective  
1091 sgRNA infection and selection. Graph shows the mean  $\pm$  SEM of 2 independent  
1092 experiments. Two-tailed Student's t-test was used to calculate statistical significance  
1093 compared to the Control sample. **(B)** Representative western blot showing RB knockout  
1094 upon sgRB expression in MCF7 cells.  $\beta$ -actin was used as a loading control.  
1095 Representative blot for 4 independent experiments. **(C)** Timeline and strategy followed to  
1096 confirm that the senescence proliferative arrest is maintained after Palbo is removed and  
1097 washed out. MCF7 cells were treated with DMSO or 500nM Palbo for 6 days, after which  
1098 the drug was removed and the cells were grown and collected at day 20. **(D)** Crystal violet  
1099 staining showing the proliferation rate of MCF7 cells expressing sgRNAs (sgF9 and sgRB)  
1100 at day 20. Palbo was removed after day 6 to confirm the induction of a stable cell cycle

1101 arrest. A representative experiment of 3 independent experiments is shown. **(E)** Relative  
1102 cell number quantification in MCF7 control or expressing sgRNAs (sgF9, sgRB) using  
1103 200nM (light grey) or 500nM (dark grey) Palbo treatment for 20 days. Data represent the  
1104 mean  $\pm$  SEM of 3 independent experiments. **(F)** mRNA levels for *F9* and *RB1* by qPCR in  
1105 MCF7 cells 20 days after setting the experiment. Data represent the mean  $\pm$  SD of 3  
1106 independent experiments. Two-tailed Student's t-test was used to calculate statistical  
1107 significance. **(G)** Crystal violet staining for MCF7 expressing sgF9 and treated with 500nM  
1108 Palbo. A representative experiment is shown. sgRB is used as positive control. **(H)** 24h  
1109 MCF7 migration assays upon 500nM Palbo treatment for 20 days expressing sgF9 and  
1110 sgRB. MDA-MB-468 cells were used as a positive control. Representative pictures of 3  
1111 independent experiments is shown. Data show the mean  $\pm$  SEM of 3 independent  
1112 experiments. One-Way ANOVA with Dunnett's multiple comparisons to Palbo was  
1113 performed. **(I)** qPCR to confirm the efficacy of two independent shRNA targeting F9  
1114 (shF9#3 and shF9#4). Data represent the mean  $\pm$  SEM. Two tailed students t-test analysis  
1115 was performed. Related to **Figure 2**.

1116

1117 **Figure S3. Induction of senescence in human primary fibroblasts (HFFF2) and**  
1118 **primary endothelial cell (HUVEC) cultures. (A)** Representative images of SA- $\beta$ -  
1119 galactosidase activity (SA- $\beta$ -Gal). Human primary fibroblasts (HFFF2) expressing an  
1120 empty vector ER:EV (iC) or ER:H-RAS<sup>G12V</sup> (iRAS) were treated with 200nM 4OHT for 6  
1121 days to induce senescence. SA- $\beta$ -Gal is shown by the incorporation of the fluorescent  
1122 compound C<sub>12</sub>FDG (green). **(B)** HFFF2 relative cell number after 2 days treatment with 50  
1123  $\mu$ M of Etoposide followed by 5 days with fresh media or 7 days with 1 $\mu$ M Palbociclib. Data  
1124 show the mean  $\pm$  SEM of 3 independent experiments. Two-tailed students t-test was  
1125 performed compared to Control sample. **(C)** HFFF2 treated with 50 $\mu$ M of Etoposide for 2  
1126 days followed by 5 days with fresh media and 1 $\mu$ M Palbo for 7 days were incubated for 8h

1127 with C<sub>12</sub>FDG compound. SA-β-gal activity (green) was determined by fluorescent signal  
1128 and representative images are shown. **(D)** Representative IF images for p21<sup>CIP1</sup> and BrdU  
1129 in HUVEC (human umbilical vein endothelial cells) control or treated with 500nM Palbo for  
1130 7 days. Representative images are shown from 3-4 independent experiments. Scale bar:  
1131 50 μm. **(E)** The graph represents the quantification for the percentage of HUVEC cells  
1132 staining positive for BrdU. The data represent the mean ± SEM of 3 independent  
1133 experiments. Two-tailed Student's t-test was used as test. Related to **Figure 3**.

1134

1135 **Figure S4. CDK4/6 inhibitors response in a variety of cancer cell lines. (A)** Relative  
1136 cell number quantified after MCF7 cells were treated with 1μM of different CDK4/6  
1137 inhibitors (Palbociclib, Abemaciclib, Ribociclib). Data show the mean ± SD of 2-5  
1138 independent experiments. Two-tailed student's t-test analysis was performed. **(B)**  
1139 Clonogenic assay shows the proliferation rate of MCF7 cells after 14 days treatment with  
1140 1μM Abema, 1μM Palbo and 1μM Ribo. Representative experiment of 2 biological  
1141 replicates. **(C)** Crystal violet staining showing the effect on proliferation for after 6 days  
1142 treatment with Palbo, Abema and Ribo. Experiment was stopped 20 days after treatment.  
1143 Representative experiment is shown. **(D)** Representative western blot showing RB  
1144 knockout in T47D cells. β-actin was used as a loading control. Blot representative of 3  
1145 independent experiments. **(E)** *F9* and *RB1* mRNA levels were determined by qPCR in  
1146 T47D cells expressing sgF9 or sgRB1. Data show the mean ± SEM of 3 independent  
1147 experiments. Two-tailed student' t-test analysis was performed. **(F)** Knockout efficiency for  
1148 sgF9 and sgRB in MDA-MD-468 cells. mRNA levels were determined by qPCR. Data show  
1149 the mean ± SEM of 3 biological replicates. Two-tailed student's t-test analysis was  
1150 performed. **(G)** Crystal violet staining showing the proliferative rate of T47D cells  
1151 expressing two independent shRNA targeting F9 (shF9#3 and shF9#4) treated with 1μM  
1152 Palbo for 20 days. Representative experiment of 3 biological replicates. **(H)** Proliferation



1153 rate of T47D expressing shF9#3 and shF9#4 treated with 1 $\mu$ M Palbo for 20 days. The data  
1154 represent the mean  $\pm$  SEM of 7 independent experiments. One Way ANOVA with  
1155 Dunnett's multiple comparisons to Palbo C sample was performed. **(I)** qPCR analysis for  
1156 the levels of *F9* mRNA in T47D cells expressing shF9#3 and shF9#4. Data show the mean  
1157  $\pm$  SEM of 3 independent experiments. Two-tailed student' t-test analysis was performed.  
1158 See also to **Figure 4**.

1159

1160 **Figure S5. Response of other cancer cell lines to different CDK4/6 inhibitors**

1161 **(A)** Panel of cancer cell lines used in the Primary Screen to determine the efficacy of  
1162 increasing concentrations of other CDK4/6/ inhibitor on proliferation. The cell lines  
1163 highlighted in orange are the ones that respond to two or more inhibitors. **(B)** Quantification  
1164 of relative cell number in 8 different cell lines selected for the Secondary Screen that  
1165 responded to more than two CKD4/6 inhibitors. 1 $\mu$ M CDK4/6 inhibitor concentration was  
1166 used. Data show the mean  $\pm$  SD of 2-5 independent experiments. Student's t-test analysis  
1167 was performed. **(C)** Crystal violet staining showing the effect on proliferation of Abema,  
1168 Ribo and Palbo in selected cell lines after 14 days of continuous drug treatment. Related  
1169 to **Figure 5**.

1170

1171

**A** Diagram of genome wide screen

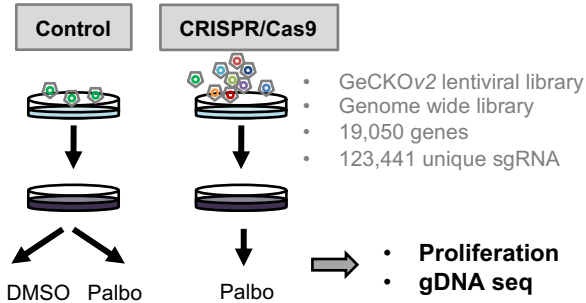

**B** Low density CV staining

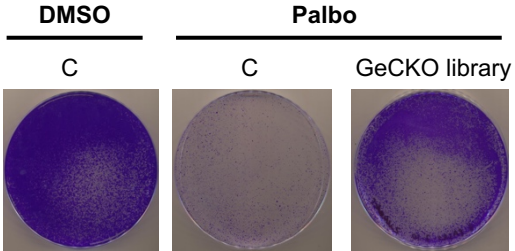

**C** gDNA sequencing

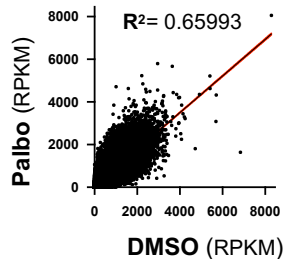

**D** 18 genes enriched - DMSO vs Palbo

|         |         |        |         |        |
|---------|---------|--------|---------|--------|
| TMEM169 | SUMO3   | GPC2   | LPAR5   | CLDN3  |
| TIMD4   | F9      | INPP5A | OR2AT4  | OR52M1 |
| AREL1   | PROZ    | SFRP2  | ARHGEF2 |        |
| HIPK3   | B4GALT3 | MRPL24 | PRPS1   |        |

**E** STRING interaction pathway

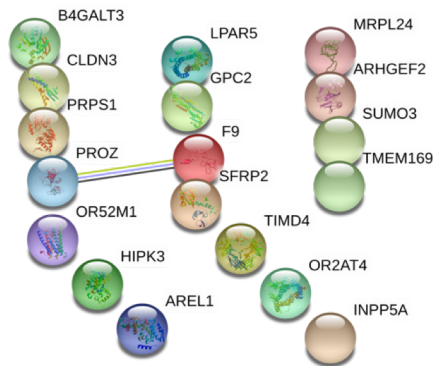

**F** KEGG Pathway analysis

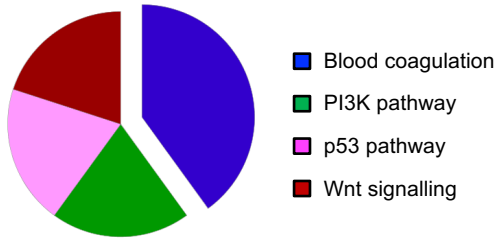

**G** sgRNA enrichment

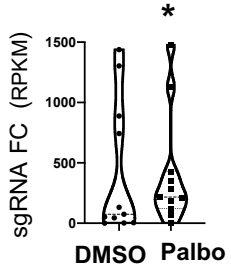

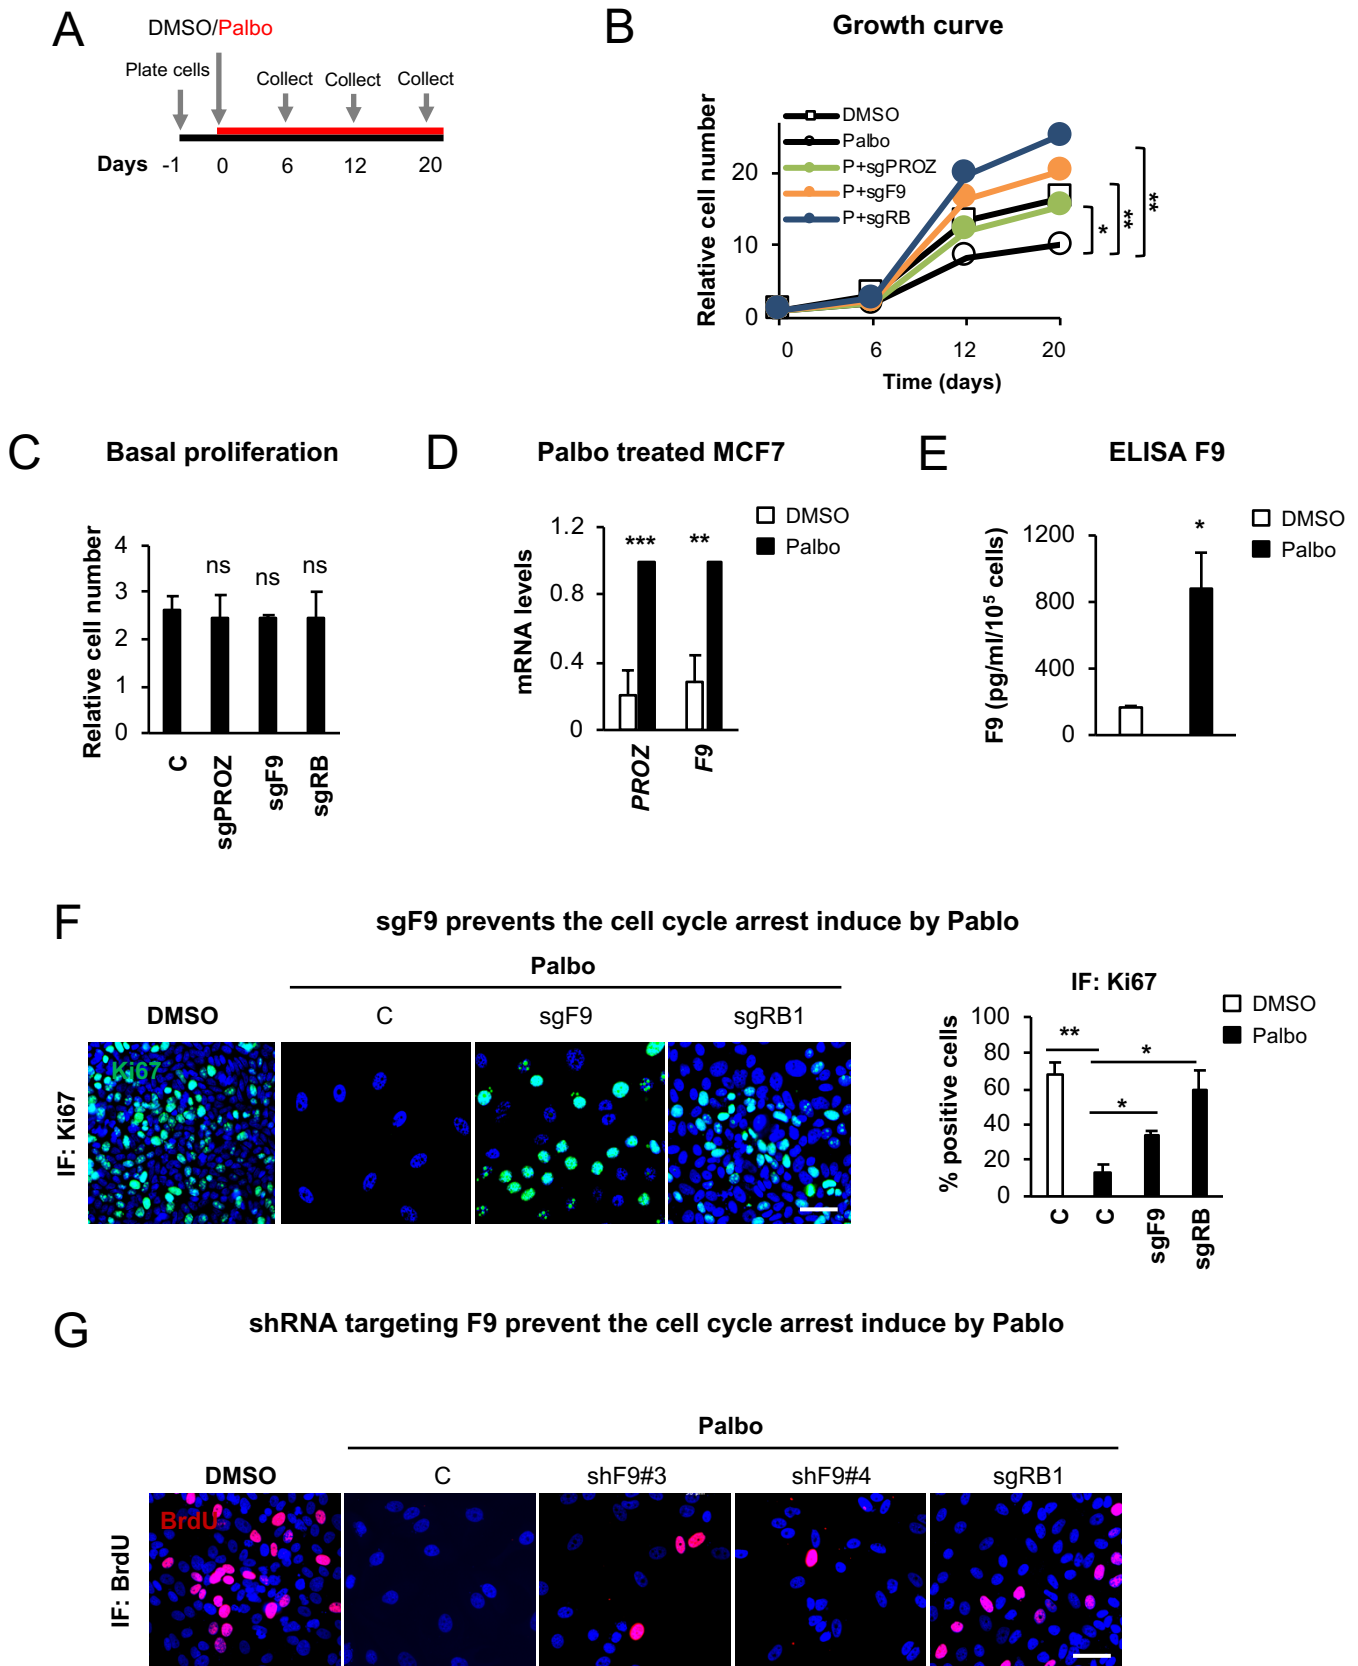

**A** sgF9 prevents Palbo-induced senescence

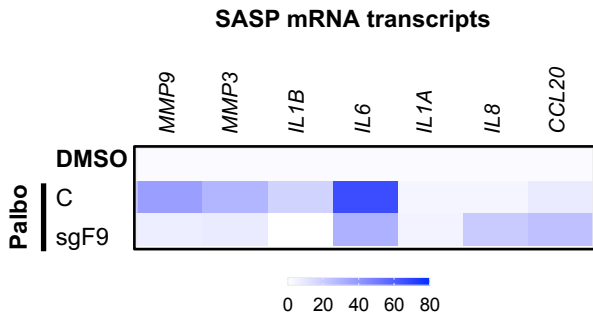

**B** F9 is not upregulated with sgRB

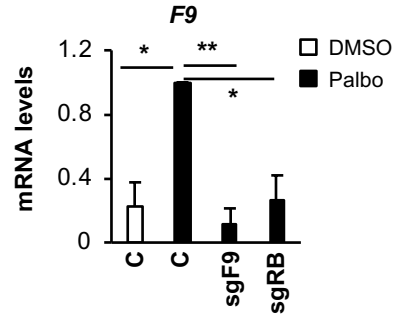

**C** F9 mRNA expression levels in senescent HFFF2

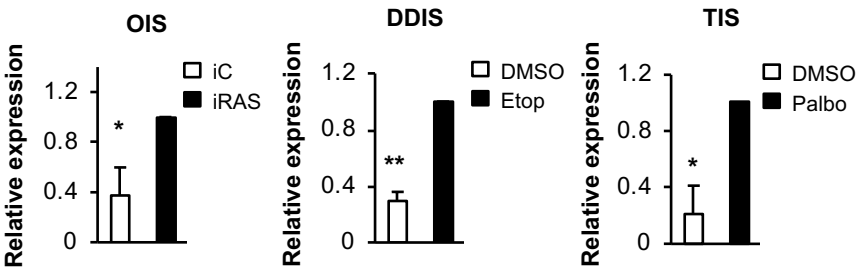

**D** F9 increase in senescent HUVEC

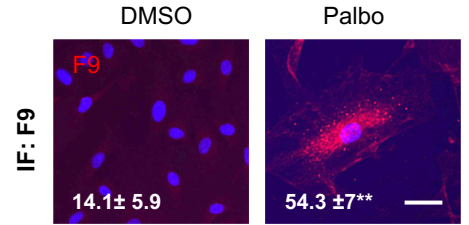

**E** IF: F9 protein levels

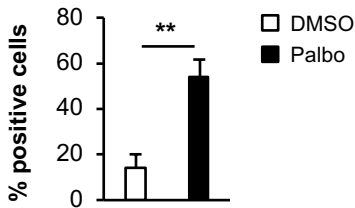

**F** F9 ectopic expression induces senescence in MCF7

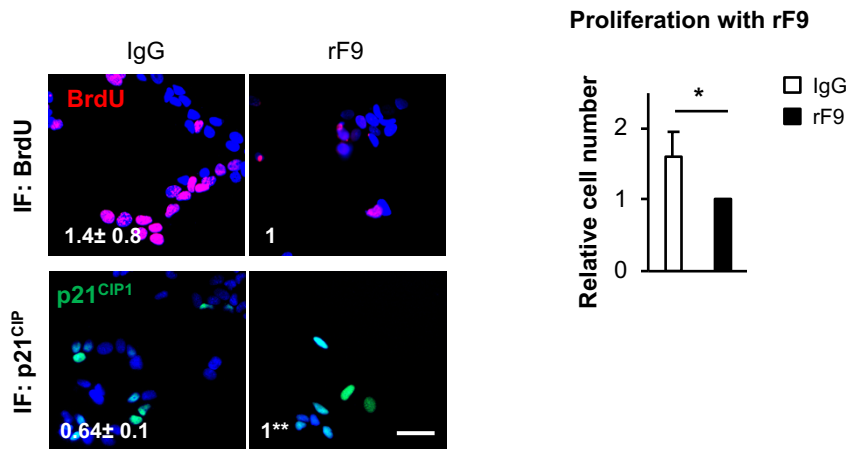

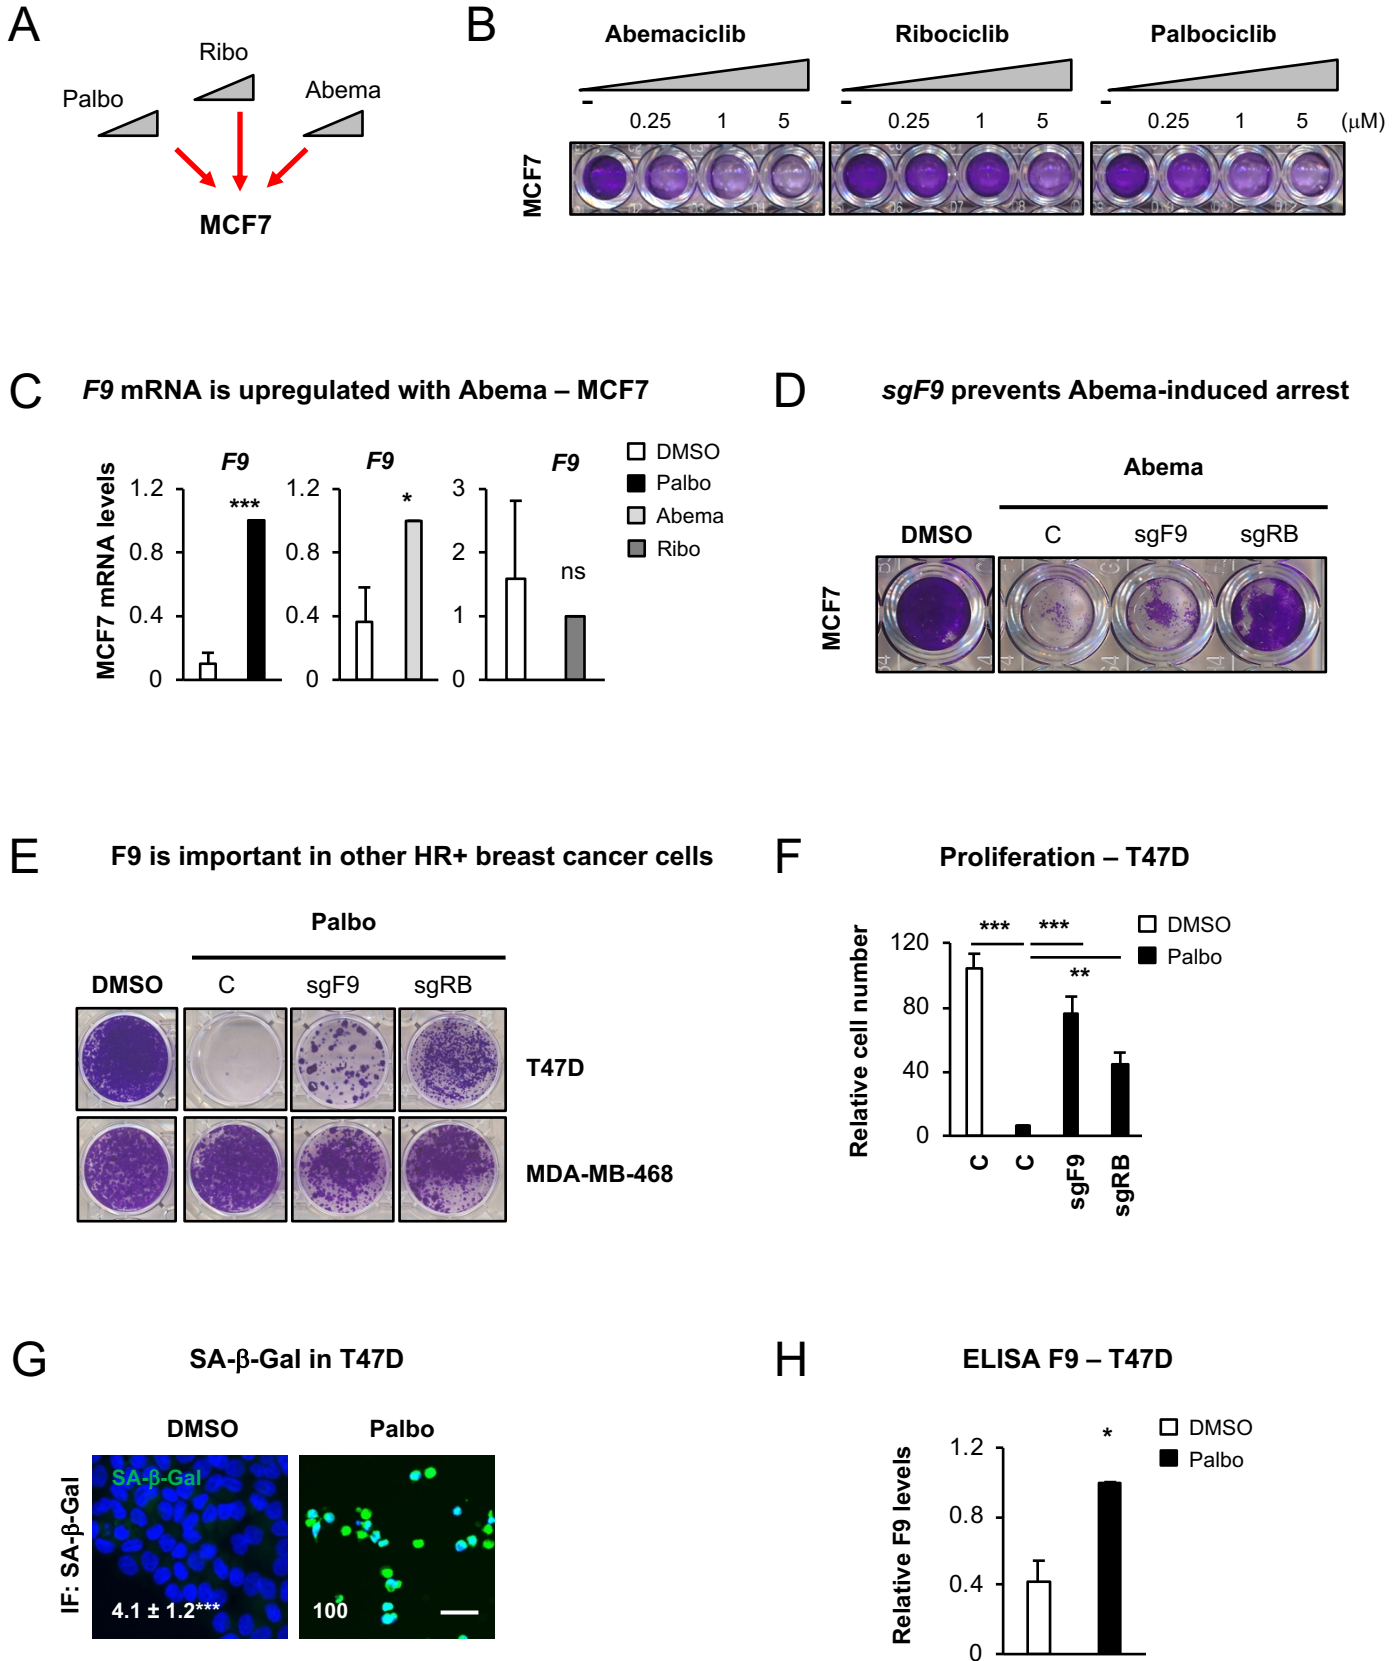

**A** Cancel cell lines Primary Screen

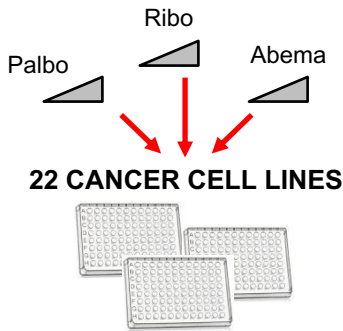

**B** Cancel cell lines selected from Primary Screen

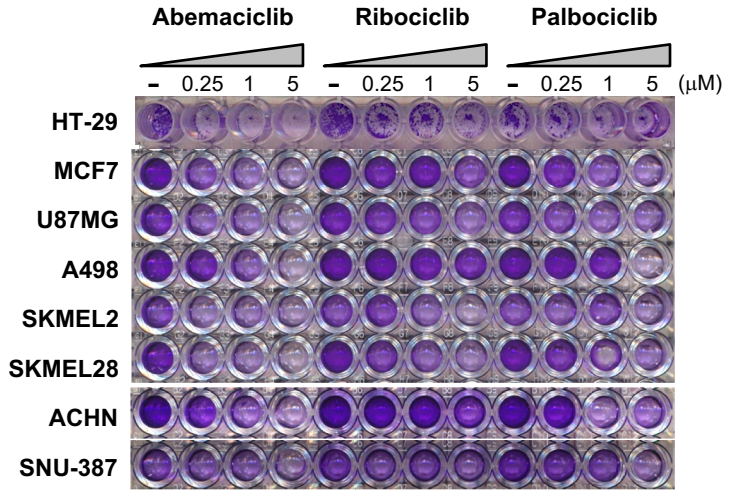

**C** Responding to  $\geq 2$  inhibitors  
Secondary Screen

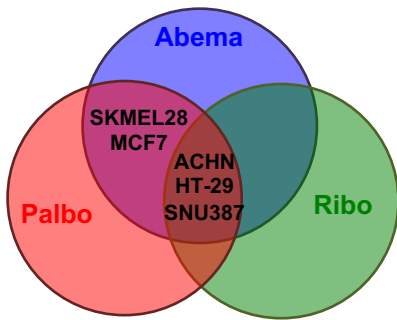

**D** *F9* expression levels in other cancer cells

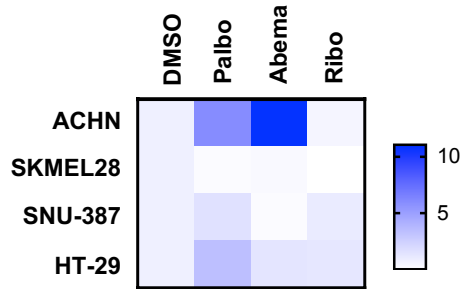

**E** ACHN expressing shF9#4

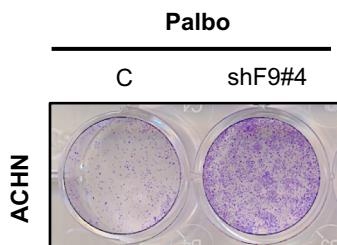

**A F9 mRNA expression in cancer**

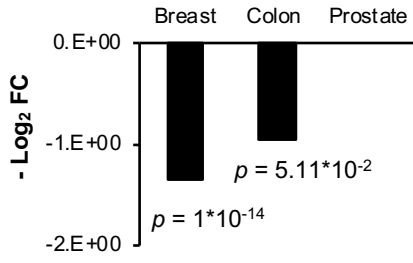

**B Coagulation transcripts in breast cancer**

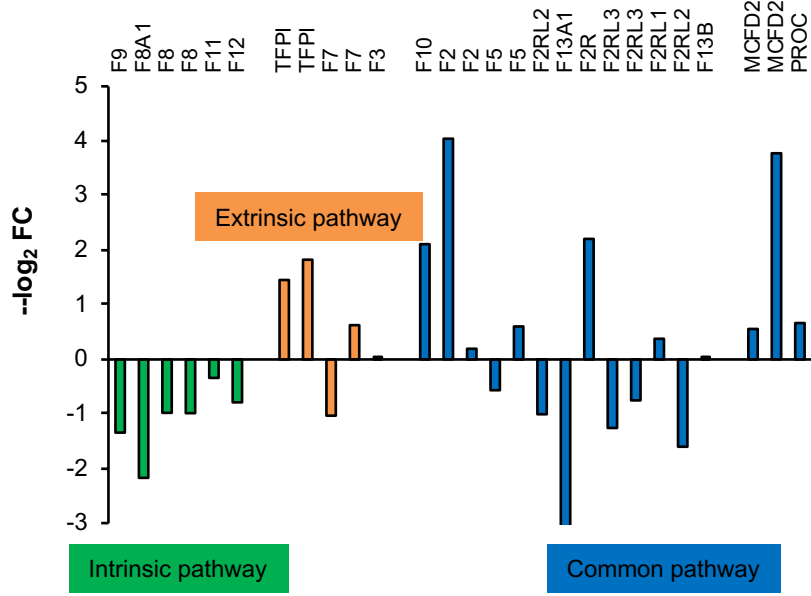

**C Cross-talk between HFFF2 and MCF7**

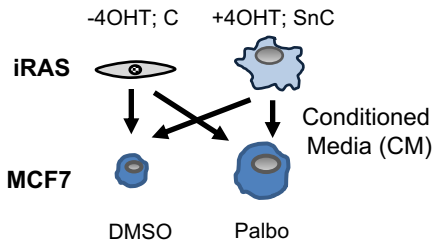

**D F9 mRNA levels in MCF7 – CM experiments**

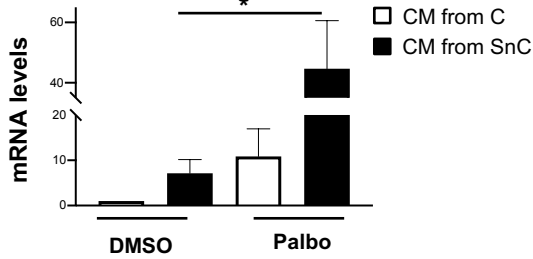

**E SASP mRNA levels in MCF7 – CM experiments**

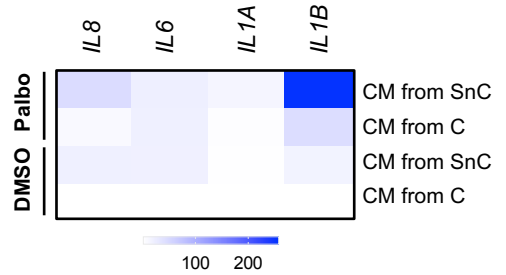

**F F9 mRNA expression in liver**

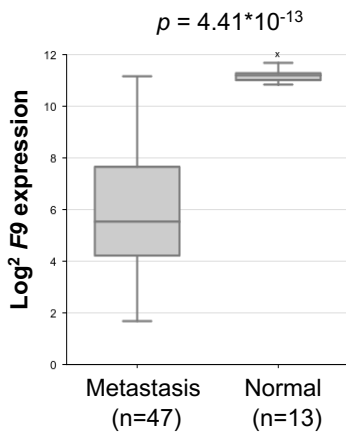

**G F9 expression levels in breast cancer**

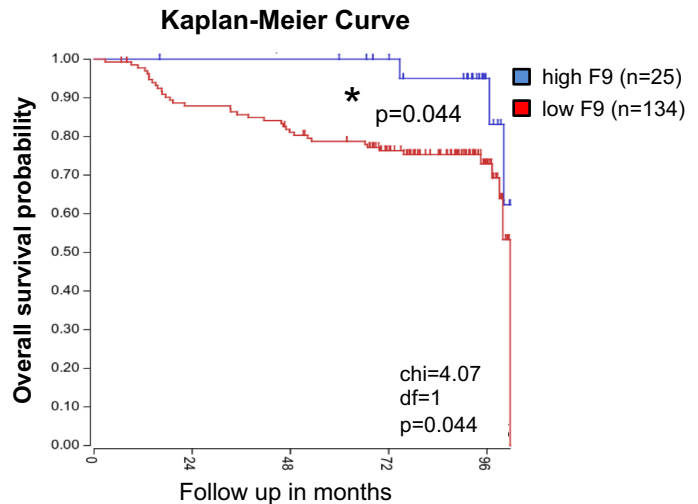

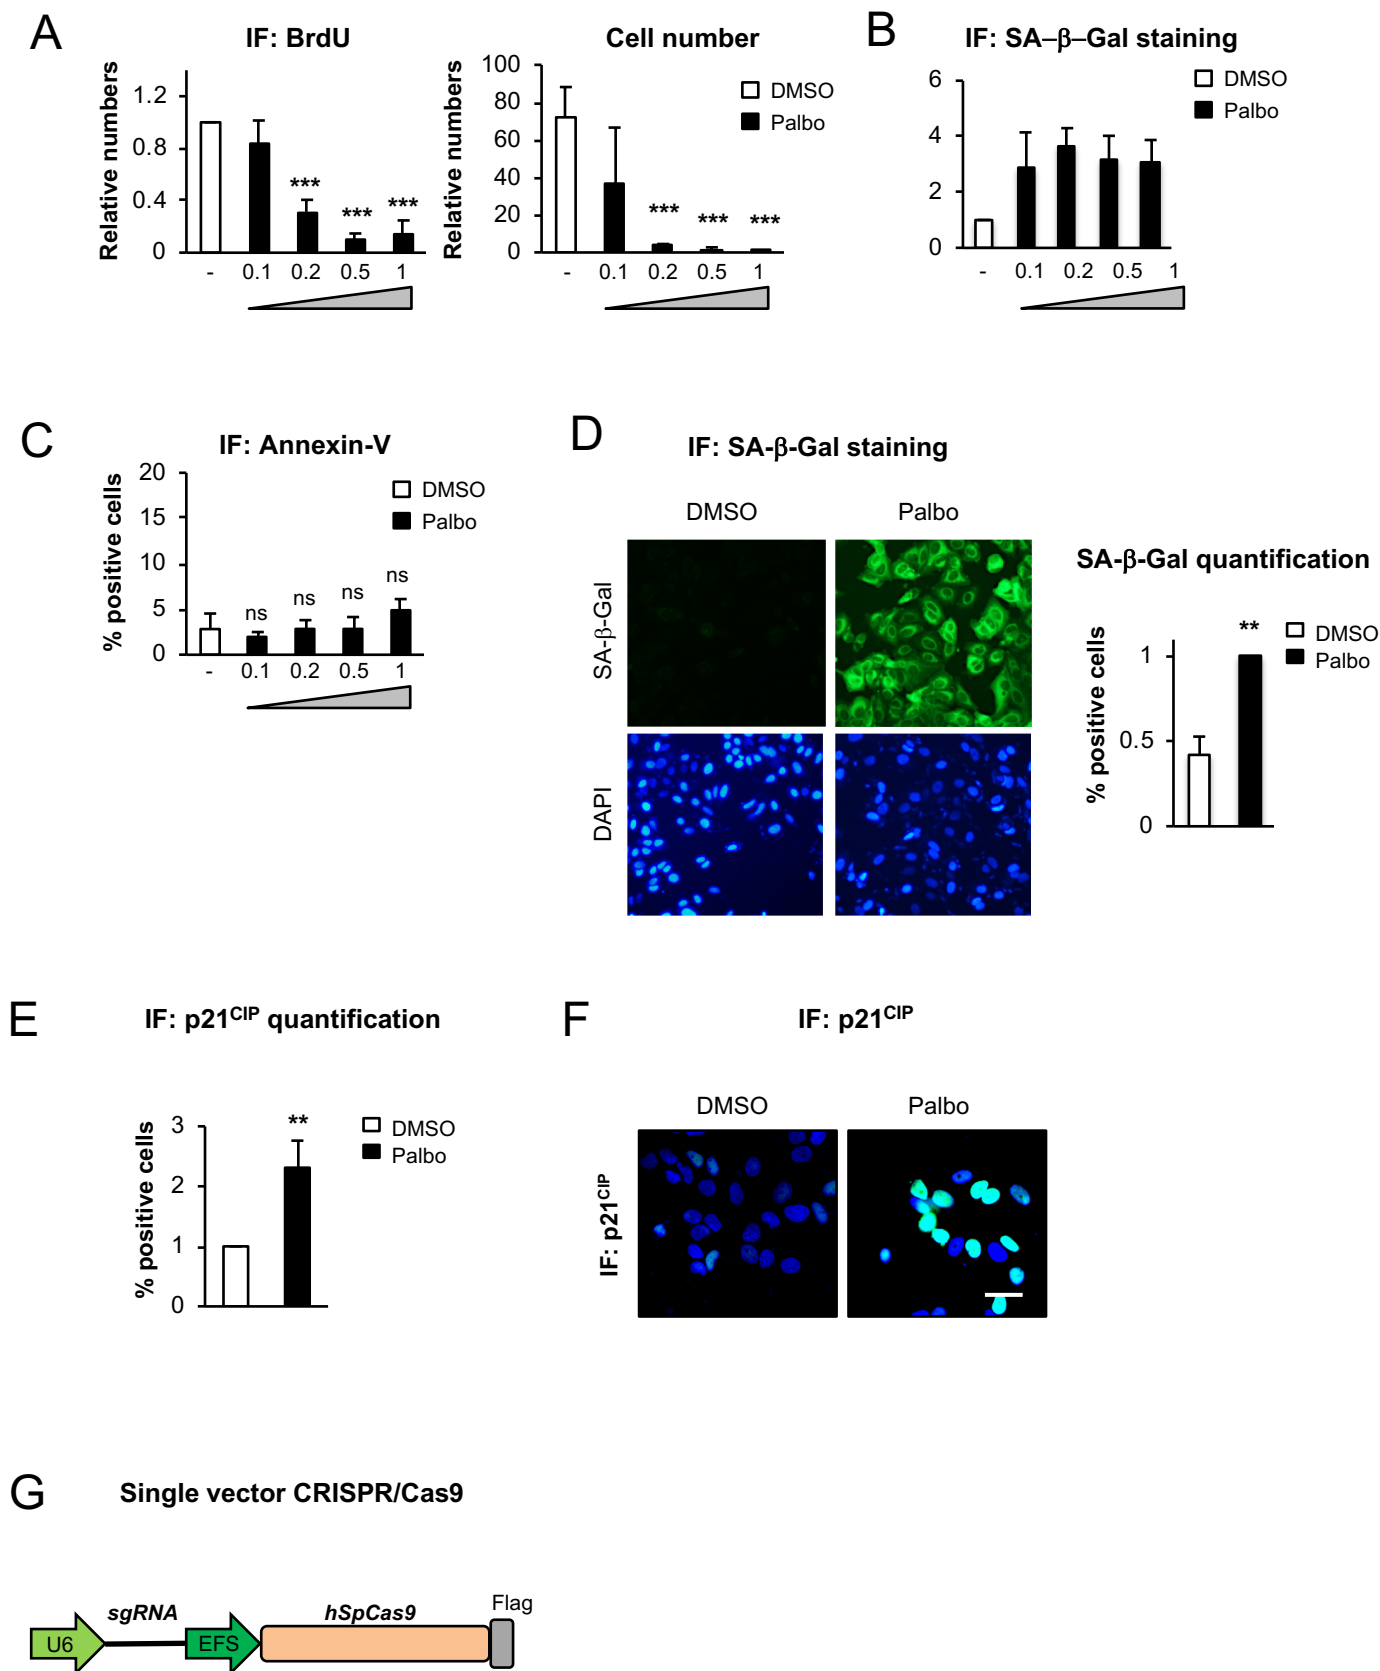



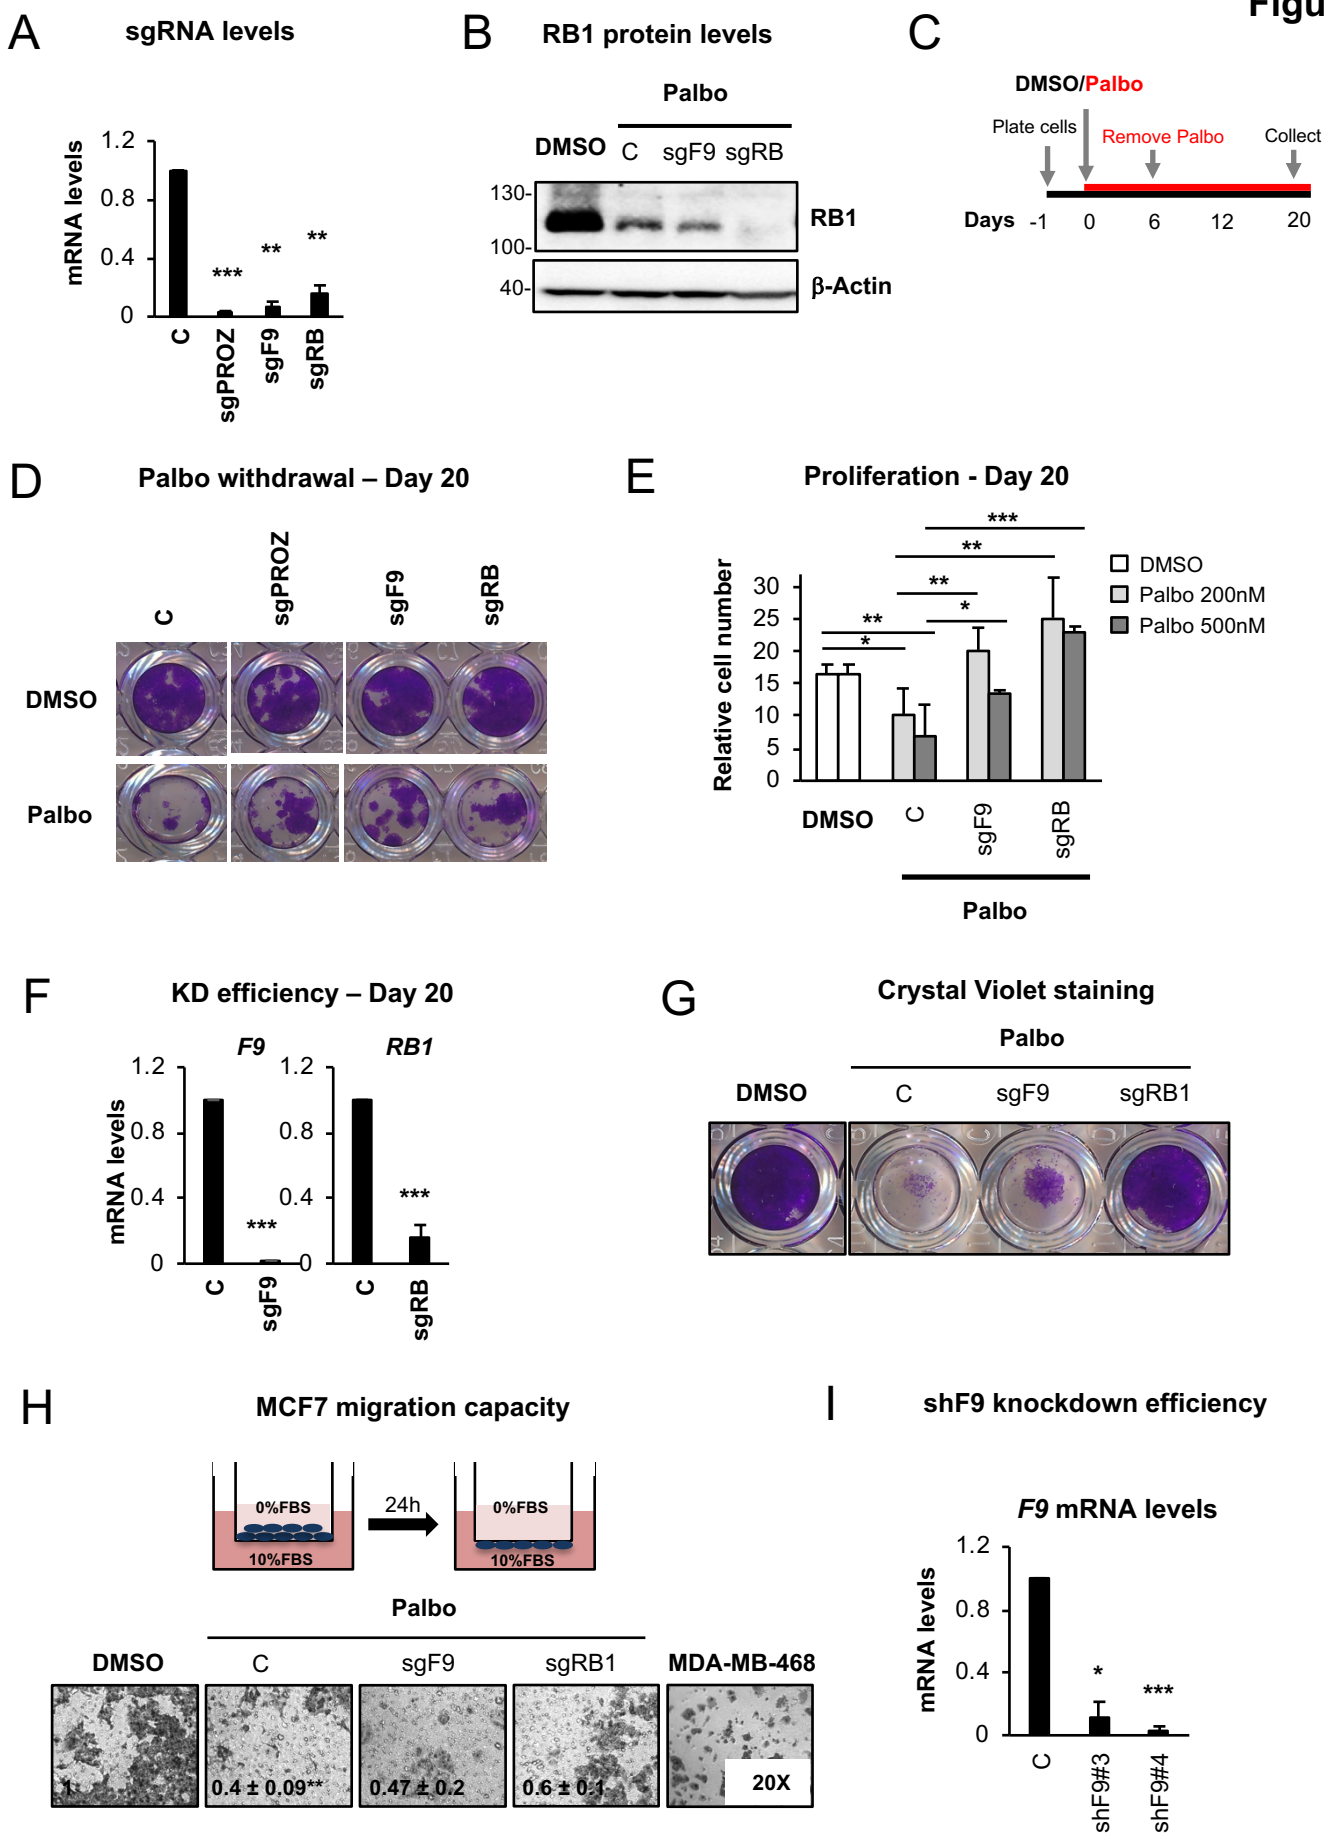

**A** SA-β-Gal activity - HFFF2

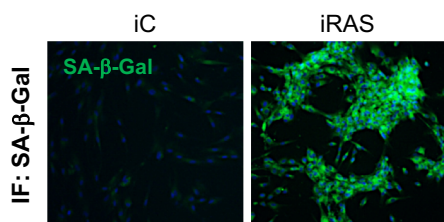

**B** Proliferation - HFFF2

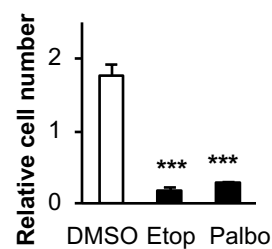

**C** SA-β-Gal activity - HFFF2

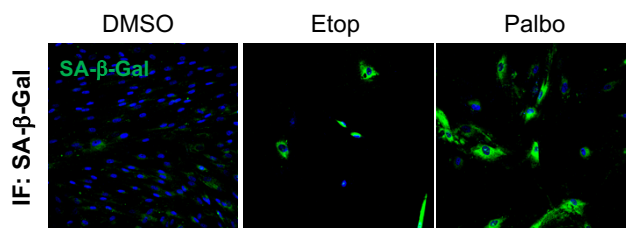

**D** Activation of senescence - HUVEC

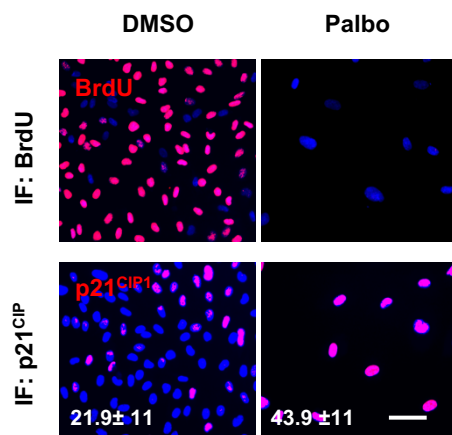

**E** IF: BrdU HUVEC

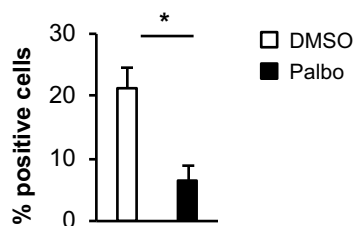

**A** Relative cell number

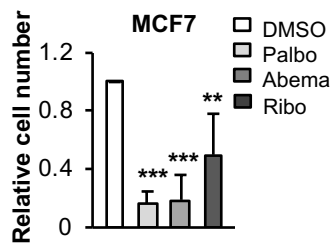

**B** CDK4/6 inhibitors treatment

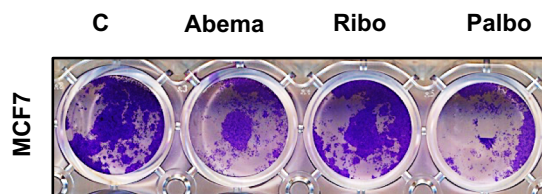

**C** Drug withdrawal

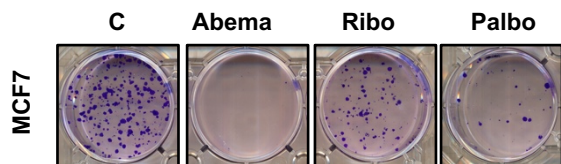

**D** RB1 protein levels - T47D

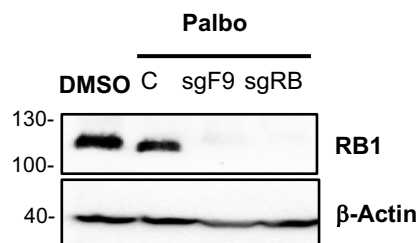

**E** Knockout efficiency in T47D

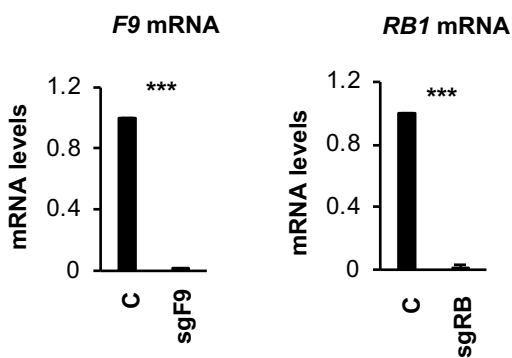

**F** Knockout efficiency in MDA-MB-468

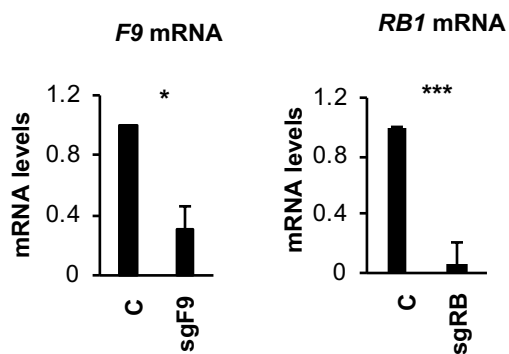

**G** shF9 induces proliferation in T47D

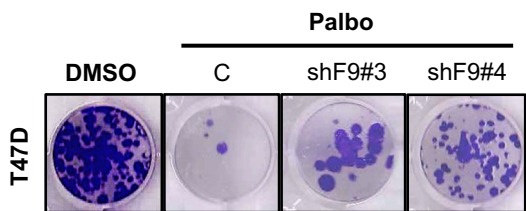

**H** Proliferation - T47D

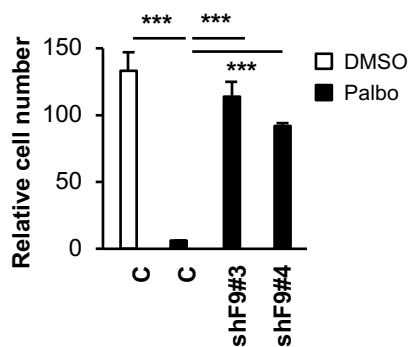

**I** Knockdown efficiency in T47D

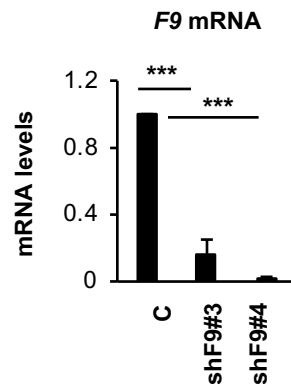

**A** Panel of 22 cell lines tested

|            |                |
|------------|----------------|
| Renal      | <b>ACHN</b>    |
| Melanoma   | <b>SKMEL28</b> |
| Breast     | <b>MCF7</b>    |
| Brain      | <b>U87MG</b>   |
| Liver      | <b>SNU-387</b> |
| Colon      | <b>HT-29</b>   |
| Melanoma   | <b>SKMEL2</b>  |
| Renal      | <b>A498</b>    |
| Pancreatic | <b>Capan-2</b> |
| Prostate   | <b>PC3</b>     |
| Lung       | <b>A549</b>    |
| Colon      | <b>HT-116</b>  |
| Melanoma   | <b>SKMEL5</b>  |
| Bladder    | <b>HT-1376</b> |
| Breast     | <b>BT-549</b>  |
| Bladder    | <b>HT-1197</b> |
| Ovarian    | <b>SKOV-3</b>  |
| Ovarian    | <b>OVCAR-3</b> |
| Brain      | <b>U118MG</b>  |
| Lung       | <b>NHI-23</b>  |
| Pancreatic | <b>PANC1</b>   |
| Prostate   | <b>DU-145</b>  |

Responding to  $\geq 2$  CDK4/6 inhibitors

**B** Cell number in cells treated with CDK4/6i

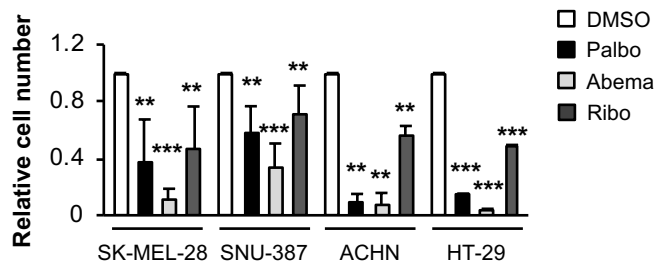

**C** Continuous drug treatment

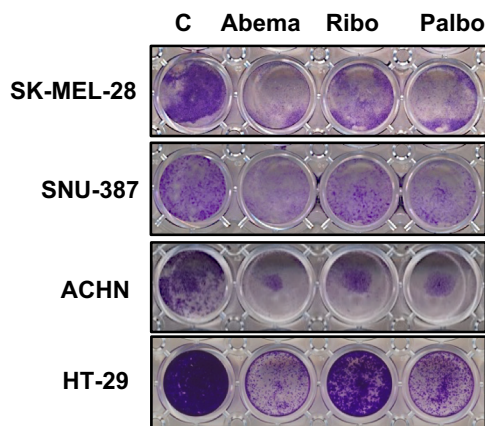

Source: https://biorxiv.org/content/10.1101/2021.11.30.470520v1.full.pdf
